1 **Loss of the E3 ubiquitin ligases UBR-5 or HECD-1 restores *Caenorhabditis elegans***  
2 **development in the absence of SWI/SNF function**

3 Lisa Lampersberger<sup>1,2</sup>, Francesca Conte<sup>3,10</sup>, Subhanita Ghosh<sup>4,10</sup>, Yutong Xiao<sup>5,10</sup>, Jonathan  
4 Price<sup>1,2,10</sup>, David Jordan<sup>1,2</sup>, David Q Matus<sup>5</sup>, Peter Sarkies<sup>4,6</sup>, Petra Beli<sup>3</sup>, Eric A Miska<sup>1,2,7,8,\*</sup> &  
5 Nicholas O Burton<sup>9\*</sup>

6  
7 <sup>1</sup> Wellcome Trust/Cancer Research UK Gurdon Institute, University of Cambridge, Cambridge, CB2 1QN, UK

8 <sup>2</sup> Department of Genetics, University of Cambridge, Cambridge, CB2 3EH, UK

9 <sup>3</sup> Institute of Molecular Biology (IMB), Mainz, 55128, Germany

10 <sup>4</sup> MRC London Institute of Medical Sciences, London, W12 0NN, UK

11 <sup>5</sup> Department of Biochemistry and Cell Biology, Stony Brook University, New York, 11790, USA

12 <sup>6</sup> Department of Biochemistry, University of Oxford, Oxford, OX1 3QU, UK

13 <sup>7</sup> Department of Biochemistry, University of Cambridge, Cambridge, CB2 1QW, UK

14 <sup>8</sup> Wellcome Sanger Institute, Wellcome Trust Genome Campus, Cambridge, CB10 1SA, UK

15 <sup>9</sup> Department of Epigenetics, Van Andel Research Institute, Grand Rapids, MI, 49503, USA

16 <sup>10</sup> These authors contributed equally

17 \* Corresponding authors

18

19 **Key words:** SWI/SNF, UBR-5, HECD-1, ubiquitination, UBR5, HECTD1, development,  
20 *C. elegans*

21

22 **Abstract**

23 SWItch/Sucose Non-Fermenting (SWI/SNF) complexes are a family of chromatin remodellers that  
24 are conserved across eukaryotes. Mutations in subunits of SWI/SNF cause a multitude of different  
25 developmental disorders in humans, most of which have no current treatment options. Here we  
26 identify an alanine to valine causing mutation in the SWI/SNF subunit *snfc-5* (*SMARCB1* in  
27 humans) that prevents embryonic lethality in *C. elegans* nematodes harbouring a loss-of-function  
28 mutation in the SWI/SNF subunit *swn-1* (*SMARCC1/2* in humans). Furthermore, we found that  
29 the combination of this specific mutation in *snfc-5* and a loss-of-function mutation in either of the  
30 E3 ubiquitin ligases *ubr-5* (*UBR5* in humans) or *hecd-1* (*HECTD1* in humans) can restore  
31 development to adulthood in *swn-1* loss-of-function mutants that otherwise die as embryos. Using  
32 these mutant models, we established a set of 335 genes that are dysregulated in SWI/SNF mutants  
33 that arrest their development embryonically but exhibit near wild-type levels of expression in the  
34 presence of suppressor mutations that prevent embryonic lethality, suggesting that SWI/SNF  
35 promotes development by regulating this specific subset of genes. In addition, we show that  
36 SWI/SNF protein levels are reduced in *swn-1; snfc-5* double mutants and partly restored to wild-  
37 type levels in *swn-1; snfc-5; ubr-5* triple mutants, consistent with a model in which UBR-5  
38 regulates SWI/SNF levels by tagging the complex for proteasomal degradation. Our findings  
39 establish a link between two E3 ubiquitin ligases and SWI/SNF function and suggest that UBR5  
40 and HECTD1 might be viable therapeutic targets for the many developmental disorders caused by  
41 missense mutations in SWI/SNF subunits.

## 42 Introduction

43 Chromatin remodellers are adenosine triphosphate (ATP)-powered molecular machines that can  
44 directly alter the structure of chromatin by reshuffling or evicting nucleosomes. Therefore, they  
45 control the access to DNA elements like enhancers, promoters and replication origins that need to  
46 be exposed to execute essential cellular processes such as transcription, replication and DNA  
47 repair (Saha et al., 2006). The SWItch/Sucrose Non-Fermenting (SWI/SNF) complexes were the  
48 first described chromatin remodellers, originally discovered in genetic screens in *Saccharomyces*  
49 *cerevisiae* in the 1980s (Neigeborn and Carlson, 1984; Stern et al., 1984). Later SWI/SNF  
50 complexes were shown to be conserved across all eukaryotes (Flaus et al., 2006). They consist of  
51 10-15 subunits, depending on the organism (Mani et al., 2017). The human SWI/SNF complex  
52 (also known as BAF) is encoded by at least 29 genes and its core comprises one of the two  
53 mutually exclusive catalytic ATPases SMARCA2 or SMARCA4 (Kadoch and Crabtree, 2015), a  
54 hetero- or homodimer of SMARCC1/2 that acts as a scaffold for other subunits in early complex  
55 assembly (He et al., 2020; Mashtalir et al., 2018) and SMARCB1, which is important for structural  
56 complex integrity (Wang et al., 2016). Genome-wide mapping of SWI/SNF complexes by ChIP-  
57 seq and mass-spectrometry analysis of SWI/SNF co-IPs discovered diverse roles for these  
58 complexes in gene regulation and numerous interactions with other protein complexes and  
59 transcription factors (Euskirchen et al., 2011). SWI/SNF chromatin remodelling is currently  
60 estimated to regulate the expression of approximately 20% of human genes (Raab et al., 2015).  
61 This is especially important in differentiation, where SWI/SNF complexes coordinate proliferation  
62 and differentiation decisions by facilitating a balance between activation of lineage-specific genes  
63 and suppression of proliferation programs (Ruijtenberg and van den Heuvel, 2016; Wilson and  
64 Roberts, 2011).

65 Complete loss of SWI/SNF function causes embryonic lethality in mice (Bultman et al.,  
66 2000) and even partial loss-of-function mutations in SWI/SNF chromatin remodellers cause  
67 developmental disorders such as Coffin-Siris syndrome, Nicolaides-Baraitser syndrome,  
68 Kleefstra's syndrome, Hirschsprung's disease, and autism in humans (Sokpor et al., 2017). The  
69 lethality observed in complete loss-of-function mutants complicates our ability to understand the  
70 mechanisms by which mutations in SWI/SNF subunits disrupt normal development (Sokpor et al.,  
71 2017). To circumvent embryonic lethality, studies have focused on studying SWI/SNF function in  
72 tissue specific mouse knock-out models (Narayanan et al., 2015) or in cell culture where individual  
73 gene knockouts are viable (Schick et al., 2019). However, cell culture models cannot recapitulate  
74 the role of SWI/SNF in animal development across tissues and the viable cell culture models are  
75 still unlikely to represent complete loss of SWI/SNF function (Schick et al., 2019).

76 In contrast to mammalian models, the *C. elegans* genome encodes only a single gene for  
77 each of the core SWI/SNF subunits. Deletions of the core subunits *swn-4* (human *SMARCA2/4*)  
78 or *swn-1* (human *SMARCC1/2*) result in embryonic or larval lethality respectively and RNAi-

79 mediated knock-down of *snfc-5* (human *SMARCB1*) similarly results in embryonic lethality (Large  
80 and Mathies, 2014). However, previous work in *C. elegans* identified a temperature-sensitive  
81 *swsn-1* mutation. *swsn-1* temperature-sensitive mutants can develop to adulthood at the  
82 permissive temperature of 15°C but arrest in embryonic development with 100% penetrance at the  
83 restrictive temperature of 22.5°C (Sawa et al., 2000). The developmental arrest phenotype of the  
84 temperature-sensitive *swsn-1* mutants is similar to developmental defects caused by SWI/SNF  
85 mutations in humans, which suggests that SWI/SNF regulation of development is a conserved  
86 process between nematodes and humans and indicates that the temperature-sensitive *swsn-1*  
87 allele in *C. elegans* is a useful model to study SWI/SNF function in development.

88 Here, we report that a specific mutation in *snfc-5* (human *SMARCB1*) can prevent  
89 embryonic lethality and early developmental arrest of *swsn-1* (human *SMARCC1/2*) mutants. In  
90 addition, we report that the loss-of-function mutations in either of the genes encoding the E3  
91 ubiquitin ligases UBR-5 or HECD-1 could further restore wild-type development in the *swsn-1*  
92 mutant model. Specifically, around 70% of hatched *swsn-1; snfc-5; ubr-5* triple mutants developed  
93 to adulthood under conditions where 100% of *swsn-1* single mutants died as embryos. Using our  
94 mutant models, we established a set of 335 genes that were specifically dysregulated in *swsn-1*  
95 mutants but exhibited near wild-type expression levels in *swsn-1; snfc-5* double and *swsn-1; snfc-5;*  
96 *ubr-5* triple mutants across three independent RNA-sequencing experiments, suggesting that  
97 the dysregulation of these genes drives the developmental defects observed in *swsn-1* mutants.  
98 In addition, using multiple independent approaches, we demonstrated that UBR-5 likely regulates  
99 the levels of SWI/SNF subunits to mediate its effects on SWI/SNF function. Our findings provide  
100 new insights into how defects in SWI/SNF function cause developmental defects and provide the  
101 first evidence suggesting that UBR5 or HECTD1, the human orthologs of UBR-5 and HECD-1, are  
102 potential therapeutic targets for developmental defects caused by missense mutations in SWI/SNF  
103 subunits.

## 104 **Results**

### 105 **Mutations in *snfc-5*, *ubr-5*, and *hecd-1* can prevent embryonic lethality and developmental** 106 **arrest in a mutant model of loss of SWI/SNF function**

107 To identify mutations that could compensate for loss of SWI/SNF function, we utilized the *ku355*  
108 temperature-sensitive (ts) loss-of-function allele of the core SWI/SNF subunit *swsn-1* in the model  
109 animal *Caenorhabditis elegans* (Cui et al., 2004). The *swsn-1* temperature-sensitive allele encodes  
110 a P68L substitution mutation in the SWIRM protein domain of SWSN-1 (Figure S1A). 100% of  
111 animals homozygous for this mutation die as embryos when grown at 22.5°C or arrest at early  
112 larval stages of development when exposed to high temperatures after completing embryonic  
113 development due to a lack of SWI/SNF function (Sawa et al., 2000). We mutagenized *swsn-1*  
114 mutants with ethyl methanesulfonate (EMS) at a permissive temperature (20°C) and subjected  
115 their F3 offspring as synchronized embryos to the restrictive temperature (25°C) for 72 hours  
116 (Figure 1SB). We identified five mutant isolates that did not arrest development at early larval  
117 stages. By performing whole genome sequencing of these five isolates, we found that one of the  
118 recovered isolates carries an additional *swsn-1* substitution mutation (V62I) nearby the original  
119 P68L mutation. This mutation is likely an internal suppressor and was not further validated. The  
120 remaining four isolates from this screen, which were all from independent pools, all carry an  
121 identical A258V substitution mutation in the gene encoding SNFC-5 (Figure S1C), another core  
122 subunit of the SWI/SNF complex and homolog of human SMARCB1. We recreated the A258V  
123 *snfc-5* mutation by CRISPR-Cas9 gene editing (Paix et al., 2015) and confirmed that this mutation  
124 prevents early larval arrest in *swsn-1* mutants (Figure S1D-F). We conclude that the A258V  
125 mutation in *snfc-5* can suppress some of the developmental defects observed in *swsn-1* mutants.

126 We found that exposure of mutant L4-staged or young adult animals to 25°C for 16 hours  
127 prior to collecting the embryos resulted in 100% embryonic lethality for *swsn-1* single mutants and  
128 95% of *swsn-1; snfc-5* double mutants (Figure S1G). Of the few surviving *swsn-1; snfc-5* double  
129 mutants 98% arrested development between L1 and L3 stages (Figure 1A-B and S1H). These  
130 findings indicate that this specific mutation in *snfc-5* can suppress the embryonic lethality in a  
131 proportion of *swsn-1* mutants but is not sufficient to restore development to adulthood in the  
132 animals that do not die as embryos. Therefore, we asked whether we could suppress the  
133 developmental defects of *swsn-1; snfc-5* double mutants further by introducing additional  
134 mutations and if this would allow us to identify novel genetic interactors of the SWI/SNF complex.  
135 To test this hypothesis, we performed a second EMS mutagenesis screen with *swsn-1; snfc-5*  
136 double mutants using these more stringent conditions and screened for mutants that could develop  
137 to adulthood (Figure S1I). From this screen we identified and sequenced the genomes of 12  
138 independently isolated mutants that developed to adulthood. We found that two of the mutant  
139 isolates have additional mutations in *swsn-1* or *snfc-5* (Figure S1J). These mutations are likely  
140 internal suppressor mutations and were not characterized further. Seven of the remaining isolates

141 each carry different predicted loss-of-function mutations in the gene encoding the HECT-type E3  
142 ubiquitin ligase UBR-5 and three have mutations in the HECT-type E3 ubiquitin ligase HECD-1, a  
143 paralog of UBR-5 (Figure 1C and S1J). We recreated the UBR-5 Q150\* allele, as it was the earliest  
144 pre-mature stop mutation we identified (see Figure 1C), by CRISPR-Cas9 gene editing (Paix et  
145 al., 2015) (*mj638*). We then crossed *swsn-1; snfc-5* double mutants to *ubr-5(mj638)* mutants and  
146 confirmed that this new mutation in *ubr-5* restored development to at least the L4 larval stage in  
147 approximately 70% of viable animals in the SWI/SNF mutant model (Figure 1A-B and S1H).  
148 Moreover, we found that approximately 29% of *swsn-1; snfc-5; ubr-5* triple mutants did not die as  
149 embryos, which is a more than 5-fold decrease of embryonic lethality compared to *swsn-1; snfc-5*  
150 double mutants (Figure S1G). Similarly, we crossed *swsn-1; snfc-5* double mutants with mutants  
151 harbouring a deletion in *hecd-1(ok1437)* and again confirmed that the loss of HECD-1 (introduction  
152 of the predicted *hecd-1* null allele) restored development to the L4 larval stage in 46% of animals  
153 in our SWI/SNF mutant model (Figure 1A-B and S1H). We conclude that mutations in *ubr-5* and  
154 *hecd-1* can restore development to adulthood in *swsn-1; snfc-5* double mutant animals.

155 To test if the loss of UBR-5 (introduction of the predicted *ubr-5* null allele) is sufficient to  
156 restore developmental defects in *swsn-1* single mutants even in the absence of the *snfc-5*  
157 mutation, we generated *swsn-1; ubr-5* double mutants and assayed their development under  
158 different conditions. We found that loss of *ubr-5* alone increased the number of *swsn-1* mutants  
159 that developed into gravid adults from 14% to 45% when embryos were grown at room temperature  
160 for 48 hours and then shifted to 25°C for 24 hours (Figure 1D-E and S1K) but was not sufficient to  
161 restore developmental defects under more stringent conditions in which *swsn-1* single mutants  
162 died as embryos (Figure 1A-B and S1H). These findings indicate that the mutation in *snfc-5* is  
163 required to suppress the embryonic lethality caused by mutation in *swsn-1*, but that the loss of  
164 UBR-5 is sufficient to improve development from larvae to gravid adults in *swsn-1* mutants under  
165 less stringent conditions.

166 Mutations in SWI/SNF subunits cause numerous defects in animal development and  
167 physiology. For example, the *swsn-1* mutation also causes defective anchor cell (AC) invasion, a  
168 process required for establishing the uterine-vulval connection during larval development critical  
169 for adult egg-laying (Smith et al., 2022) (see schematic of AC invasion in Figure 1F). To test  
170 whether the suppressor mutations we identified specifically suppress the developmental arrest in  
171 *swsn-1* mutants or if they might generally suppress the loss of SWI/SNF function, we assayed AC  
172 invasion in wild-type, *swsn-1* mutants, and various combinations of double and triple mutant  
173 animals. We found that *swsn-1* single mutants exhibited defective AC invasion phenotype in 20%  
174 (10/50 animals) of animals (Figure 1G and S1L-M), consistent with previously published findings  
175 (Smith et al., 2022). This phenotype was partially rescued in *swsn-1; snfc-5* double (5.2% invasion  
176 defects, 4/77 animals) and *swsn-1; snfc-5; ubr-5* triple mutants (6.78% invasion defects, 5/74  
177 animals), but not in *swsn-1; ubr-5* double mutants (23% invasion defects, 7/30 animals) (Figure  
178 1G and S1L-M). These data suggest that the mutation in *snfc-5* generally suppresses many of the

179 defects observed in *swns-1* single mutants, but that the loss of UBR-5 specifically suppresses the  
 180 developmental arrest caused by loss of SWI/SNF function.

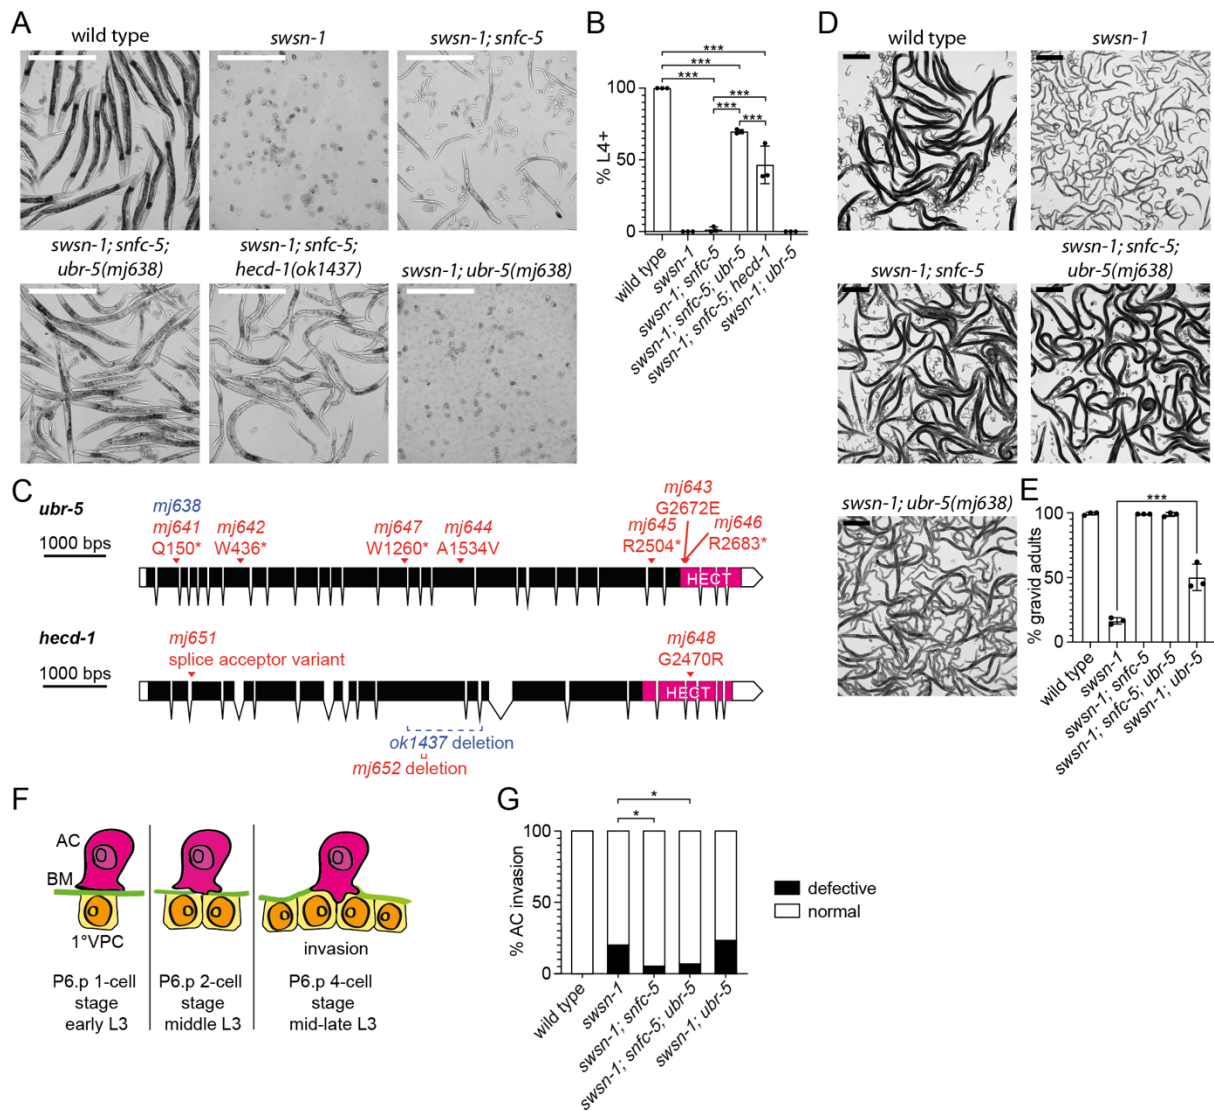

181  
 182 **Figure 1: Mutations in *snfc-5*, *ubr-5*, and *hecd-1* can prevent embryonic lethality and developmental arrest**  
 183 **of *swns-1* mutants.** **A-B** Quantification of *C. elegans* developmental stages after exposing the parental  
 184 generation to 25°C for 16 hours and collecting and growing embryos at 25°C for 72 hours. (A) Representative  
 185 images of wild-type animals, *swns-1* single, *swns-1; snfc-5* double, *swns-1; snfc-5; ubr-5* triple, *swns-1; snfc-5;*  
 186 *hecd-1* triple and *swns-1; ubr-5* double mutants, scale bar = 500µm. (B) Percentage of L4 stage or older animals  
 187 (n=3 of >= 100 animals), bar heights represent the mean, error bars represent standard deviation, \*\*\* = Bonferroni  
 188 corrected Fisher's exact test p-value < 0.0001, calculated using contingency table in Figure S1H. **C**) Schematic  
 189 representation of *ubr-5* and *hecd-1* with alleles identified in the second EMS screen (red), CRISPR recreated Q150\*  
 190 *ubr-5* allele (blue) and available *hecd-1* deletion allele *ok1437* (blue). C-terminal HECT domains are indicated in  
 191 pink. Graphic made using <http://wormweb.org/exonintron>. **D-E**) Quantification of *C. elegans* developmental stages  
 192 after embryos were exposed to 22.5°C for 48 hours and 25°C for 24 hours. (D) Representative images of wild-type  
 193 animals, *swns-1* single, *swns-1; snfc-5* double, *swns-1; snfc-5; ubr-5* triple and *swns-1; ubr-5* double mutants,  
 194 larvae in the images of the wild-type, *swns-1; snfc-5* double and *swns-1; snfc-5; ubr-5* triple mutants are the  
 195 offspring of scored animals and were not scored, scale bar = 500µm. (E) Percentage of gravid adults (n=3 of >100  
 196 scored animals), bar heights represent the mean, error bars represent standard deviation, \*\*\* = Bonferroni  
 197 corrected Fisher's exact test p-value < 0.0001, calculated using contingency table in Figure S1K. **F-G**)  
 198 Quantification of anchor cell (AC) invasion. (F) Schematic of AC invasion, BM = basement membrane, 1° VPC =  
 199 primary vulval precursor cell. (G) Scoring of invasion defects, \* = Fisher's exact test p-value < 0.05, calculated  
 200 using contingency table in Figure S1M. Alleles used: *swns-1(ku355)*, *snfc-5(mj633)*, *ubr-5(mj638)*, *hecd-1(ok1437)*.

201 **Loss of the UBR-5 key catalytic residue is sufficient to suppress the developmental arrest**  
202 **of SWI/SNF mutants**

203 HECT-type E3 ubiquitin ligases such as UBR-5 and HECD-1 have a catalytic cysteine within their  
204 C-terminal HECT domains (Wang et al., 2020). Ligation reactions depend on this catalytic cysteine,  
205 which forms a thioester-linked intermediate with the ubiquitin before ligating it onto a substrate  
206 protein (Wang et al., 2020). We replaced the catalytic residue of UBR-5 (cysteine 2913) with an  
207 alanine or serine by CRISPR-Cas9 gene editing (Paix et al., 2015) (Figure 2A). The C2913A  
208 substitution mutation should prevent the loading of ubiquitin onto UBR-5, whereas the C2913S  
209 substitution mutation should still enable the loading, but prevent the transfer of ubiquitin onto a  
210 substrate (Garcia-Barcena et al., 2020). We found that substitution of the catalytic cysteine of  
211 UBR-5 to alanine or serine in *swn-1; snfc-5* double mutants resulted in a similar suppression of  
212 the temperature-sensitive larval arrest as introducing the premature stop *ubr-5* allele (*mj638*)  
213 (Figure 2B-C and S2). These results indicate that inactivation of the catalytic function of UBR-5 is  
214 sufficient for the suppression of developmental arrest of *swn-1; snfc-5* mutants.

215 **The combined loss of UBR-5 and HECD-1 has deleterious effects on *C. elegans***  
216 **reproduction**

217 Since the loss of either UBR-5 or HECD-1 restored development to adulthood in some of the  
218 *swn-1; snfc-5* double mutants (Figure 1A-B and S1H), we wondered whether the combined loss  
219 of both E3 ubiquitin ligases would have an even greater effect. However, when generating *swn-1;*  
220 *snfc-5; ubr-5; hecd-1* quadruple mutants, we observed that those animals were substantially sicker  
221 and had fewer offspring than other mutant combinations. This effect appears to be a synthetic  
222 interaction between *ubr-5* and *hecd-1* because we found that *ubr-5; hecd-1* double mutants  
223 exhibited a similar phenotype even in the absence of any SWI/SNF subunit mutations. Specifically,  
224 we found that the loss of either of the paralogous HECT-type E3 ubiquitin ligases alone did not  
225 affect animal reproduction, but the loss of both UBR-5 and HECD-1 resulted in a substantial  
226 reduction of live offspring. On average the *ubr-5; hecd-1* double mutants had about four-times  
227 fewer live offspring than either of the *ubr-5* or *hecd-1* single mutants (Figure 2D). The quadruple  
228 mutants also had significantly fewer live offspring compared to the *swn-1; snfc-5; ubr-5* triple  
229 mutants and did not have significantly fewer offspring compared to the *ubr-5; hecd-1* double  
230 mutants (Figure 2D). Thus UBR-5 and HECD-1 likely have redundant functions and loss of one  
231 can be compensated by the other protein. To our knowledge, these findings are the first to indicate  
232 that these two ubiquitin ligases might function redundantly.



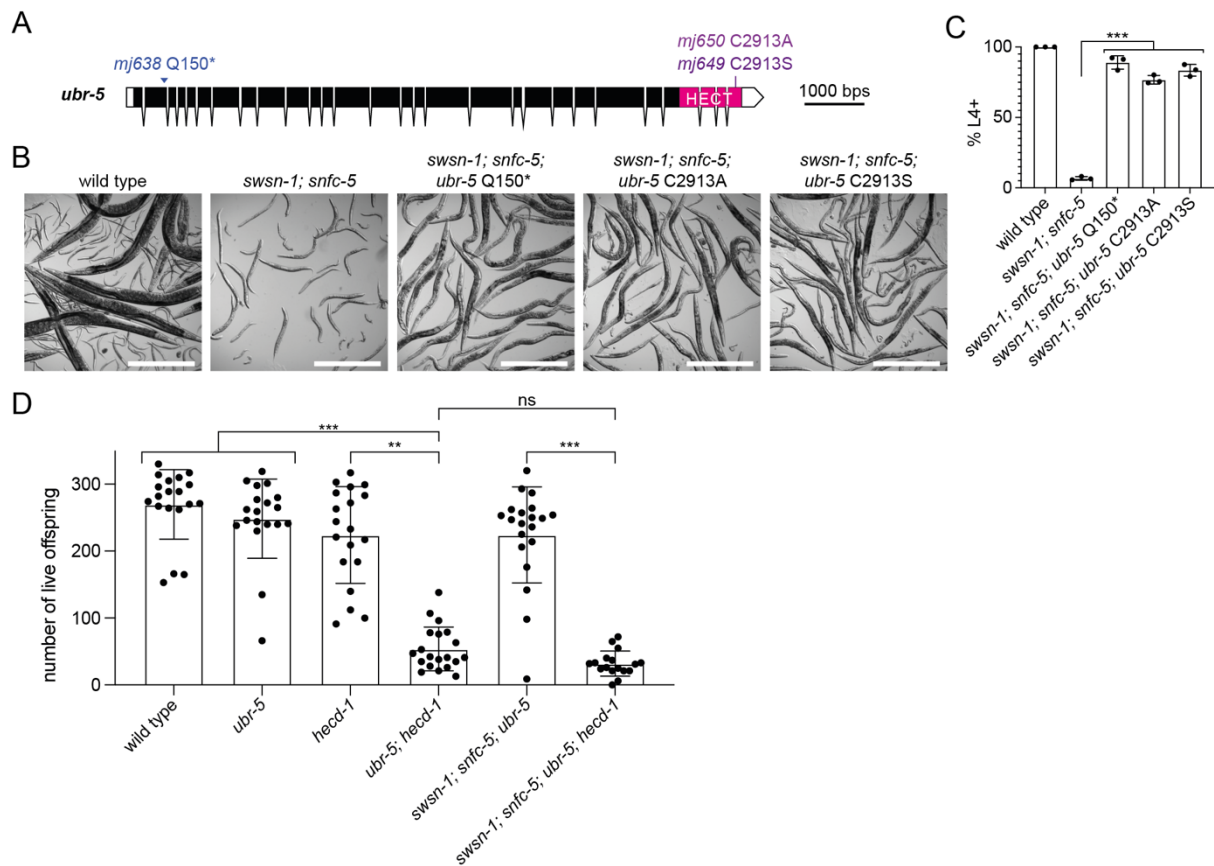

233  
 234 **Figure 2: Loss of key catalytic residue of UBR-5 is sufficient for developmental arrest suppression and the**  
 235 **combined loss of UBR-5 and HECD-1 have deleterious effects on *C. elegans* reproduction. A)**  
 236 **schematic representation of *ubr-5* with CRISPR generated Q150\*, C2913A and C2913S substitutions. C-terminal HECT**  
 237 **protein domains are indicated in pink. B-C)** Quantification of *C. elegans* developmental stages after exposing the  
 238 **parental generation to 25°C for 16 hours and collecting and growing embryos at 25°C for 72 hours. (B)**  
 239 **Representative images of wild-type animals (larvae in this image are the offspring of scored animals and were not**  
 240 **scored), *swsn-1; snfc-5* double, *swsn-1; snfc-5; ubr-5 Q150\** triple, *swsn-1; snfc-5; ubr-5 C2913A* triple and *swsn-1;*  
 241 ***snfc-5; ubr-5 C2913S* triple mutants, scale bar = 500 μm. (C) Percentage of animals L4 larval stage or older (n=3**  
 242 **of >=100 scored animals), bar heights represent the mean, error bars represent standard deviation, \*\*\* = Bonferroni**  
 243 **corrected Fisher's exact test p-value < 0.0001, calculated using contingency table in Figure S2. D)** Number of live  
 244 **offspring of individual wild-type animals, *ubr-5* single, *hecd-1* single, *ubr-5; hecd-1* double, *swsn-1; snfc-5; ubr-5***  
 245 **triple and *swsn-1; snfc-5; ubr-5; hecd-1* quadruple mutant animals, bar heights represent the mean and error bars**  
 246 **represent standard deviation, Kruskal-Wallis test ( $H_5 = 74.76$ ,  $p < 0.001$ ), Dunn's multiple comparison adjusted p-**  
 247 **value \*\* = < 0.001, \*\*\* = < 0.0001, ns = not significant. Alleles used: *swsn-1(ku355)*, *snfc-5(mj633)*, *ubr-5(mj638)***  
 248 **(this *ubr-5* allele was used in D), *ubr-5(mj650)*, *ubr-5(mj649)*, *hecd-1(ok1437)*.****

## 249 UBR-5 regulates SWI/SNF protein levels

250 Our findings suggest that the catalytic activity of UBR-5 is involved in suppressing the *swsn-1* mutant  
 251 developmental arrest (Figure 2B-C and S2). One of the best understood roles of ubiquitin ligation  
 252 to proteins is to tag them for proteasomal degradation (Akutsu et al., 2016). The human homologs  
 253 of UBR-5 and HECD-1, UBR5 and HECTD1 respectively, have both been shown to mediate K48-  
 254 linked ubiquitination (Wang et al., 2020), which is a signal for proteasomal degradation (Zheng and  
 255 Shabek, 2017). A possible and direct link between the SWI/SNF complex and these two ubiquitin  
 256 ligases could be that the *swsn-1* mutation destabilizes the SWI/SNF complex and that these  
 257 enzymes ubiquitinate unstable complexes to promote their degradation. In this case, loss of UBR-5

258 should result in higher levels of SWSN-1 which in turn might explain the observed developmental  
259 arrest suppression. To test this hypothesis, we measured SWSN-1 protein levels in wild-type  
260 animals, *swsn-1* single, *swsn-1; snfc-5* double and *swsn-1; snfc-5; ubr-5* triple mutants by Western  
261 blotting. We generated endogenously FLAG-tagged wild-type and mutant versions of SWSN-1  
262 (Figure 3A). We synchronized L1-staged animals by starvation and subsequently fed them and  
263 exposed them to the restrictive temperature (25°C) for six hours. These conditions were chosen  
264 so that all of the mutants would be at closely matched developmental stages. We found that levels  
265 of SWSN-1 were on average approximately 40% reduced in *swsn-1* single mutants when  
266 compared to wild-type animals, suggesting that the P86L mutation reduces SWSN-1 protein levels.  
267 This reduction in SWSN-1 levels was largely restored in *swsn-1; snfc-5; ubr-5* triple mutants  
268 (Figure 3B). However, these effects were highly variable and the levels of SWSN-1 were not  
269 statistically significantly different between *swsn-1; snfc-5* double mutants and *swsn-1; snfc-5; ubr-5*  
270 triple mutants (Figure 3B) even though we found that most *swsn-1; snfc-5* double mutants arrested  
271 their development at early larval stages while most *swsn-1; snfc-5; ubr-5* triple mutants were able  
272 to develop to L4-stages and adulthood (Figure 1A-B and S1H). These results suggest that mutation  
273 of *swsn-1* leads to a reduction of SWSN-1 protein levels. Furthermore, UBR-5 potentially has either  
274 a small effect on SWSN-1 protein levels or an effect that occurs only in specific cells or at specific  
275 developmental stages that is difficult to detect when measuring SWSN-1 levels in whole animals  
276 by Western blotting.

277 As an alternative approach to assess SWSN-1 protein levels at the single cell level in the  
278 different mutant animals, we measured SWSN-1::EGFP levels in the in the AC of mid-late L3-  
279 staged animals that had been exposed to the restrictive temperature (25°C) from the L2-L3  
280 molt/early L3 stage until the P6.p 4-cell stage by confocal fluorescence microscopy. For this  
281 purpose, we obtained an available SWSN-1::EGFP strain, in which we introduced the P86L  
282 temperature-sensitive mutation (Figure 3C) and crossed it to *snfc-5* and *ubr-5* mutants to generate  
283 double and triple mutants. Consistent with the Western blot quantifications, we found that SWSN-1  
284 protein levels in the AC were significantly reduced in *swsn-1* single and *swsn-1; snfc-5* double  
285 mutants compared to wild-type animals (Figure 3D-E and S3A). In this cell specific context, we  
286 observed a statistically significant increase of SWSN-1 levels in the in *swsn-1; snfc-5; ubr-5* triple  
287 mutants when compared to *swsn-1* single and *swsn-1; snfc-5* double mutants (Figure 3D-E and  
288 S3A), indicating that UBR-5 regulates SWSN-1 levels in the AC.

289 To gain better insight into the role of UBR-5 in regulating the abundance of SWI/SNF  
290 subunits, we employed a mass spectrometry approach to look at alterations in protein levels in  
291 wild-type animals, *swsn-1; snfc-5* double mutants and *swsn-1; snfc-5; ubr-5* triple mutants. Label-  
292 free quantification (LFQ) of whole proteome samples from synchronized L1-staged animals  
293 revealed a significant decrease in SWSN-1 protein levels in *swsn-1; snfc-5* double mutants  
294 compared to wild type animals (Figure 3F). Consistently with Western blotting results, SWSN-1  
295 levels were partially restored to wild-type levels in *swsn-1; snfc-5; ubr-5* triple mutants (Figure 3F),

296 a trend that was consistent in all detected SWI/SNF subunits (Figure 3G). Notably, every subunit  
297 of the complex showed this same pattern; the highest levels were in the wild type animals, reduced  
298 levels in the *swn-1; snfc-5* double mutants, and partially recovered levels in the *swn-1; snfc-5;*  
299 *ubr-5* triple mutants, however, the mean protein abundance of each subunit was different.  
300 Therefore, we performed a multiple linear regression analysis to determine the effect of the  
301 mutation on the entire complex by regressing out the effect of the different mean expression levels.  
302 This analysis revealed that the SWI/SNF complex, as a whole, is significantly depleted in the  
303 *swn-1; snfc-5* double mutants when compared to wild-type animals and that this depletion is  
304 partially rescued in *swn-1; snfc-5; ubr-5* triple mutants (Figure 3H and S3B-C). The same analysis  
305 with 100 randomly chosen sets of twelve proteins was not significant (depicted by the intervals to  
306 the right of the boxplots in Figure 3H). Figure S3D-E shows an example of a regression analysis  
307 for one set of twelve randomly selected proteins (ARX-6, EXOS-1, CYN-1, NBET-1, EMB-4,  
308 ZK1236.5, VPS-29, TFTC-3, MDT-9, TBA-1, HMT-1 and Y39G8B.1). All together these data  
309 indicate that the loss of UBR-5 results in increased protein levels of all SWI/SNF subunits in the  
310 *swn-1; snfc-5* mutant model. Furthermore, these results suggest that UBR-5 likely ubiquitinates  
311 the SWI/SNF complex to tag it for proteasomal degradation and that the loss of UBR-5 likely  
312 prevents some of the developmental defects exhibited in SWI/SNF mutants by increasing  
313 SWI/SNF complex abundance. Our findings that levels of all SWI/SNF subunits of *swn-1; snfc-5*  
314 double mutants are reduced compared to wild-type animals are consistent with previously  
315 published mouse data (Narayanan et al., 2015).

316 To determine how UBR-5 and HECD-1 regulate protein levels in animals, we similarly  
317 obtained mass spec proteomics data of wild-type animals, *ubr-5* single and *hecd-1* single mutants.  
318 When comparing protein levels of SWI/SNF subunits, we found that SWSN-7 and PHF-10 are  
319 significantly upregulated (FDR < 0.05) by 11 and 23% respectively in *ubr-5* single mutants  
320 compared to wild-type animals (Table S1) and that SWSN-3 is significantly upregulated (FDR <  
321 0.05) by 10% in *hecd-1* single mutants compared to wild-type animals (Table S2). This data  
322 suggests that the steady state levels of specific individual SWI/SNF subunits could also be  
323 regulated by UBR-5 and HECD-1 ubiquitination, but that the loss of UBR-5 or HECD-1 does not  
324 broadly increase the abundance of all SWI/SNF subunits in wild-type animals.

325 It remains possible that in addition to regulating SWI/SNF protein levels, UBR-5 also  
326 ubiquitinates other proteins and that restoring the levels of these proteins also helps SWI/SNF  
327 mutants develop to adulthood. Our proteomics analysis identified twelve significantly upregulated  
328 proteins (fold-change  $\geq 1.5$ : FDR  $\leq 0.05$ ) (SKP-1, F08F3.4, FBXA-156, ZK228.4, T19H12.2,  
329 F36A2.3, GST-41, PCN-1, HAT-1, HRG-2, HSP-16.1 and HSP-16.49) in *swn-1; snfc-5; ubr-5*  
330 triple mutants when compared to *swn-1; snfc-5* double mutants (Figure S3F). The collective  
331 upregulation of those twelve proteins in *swn-1; snfc-5* mutants might contribute to the suppression  
332 of observed developmental defects. Furthermore, using the proteomics data of *ubr-5* and *hecd-1*  
333 single mutants, we could identify 21 proteins significantly upregulated in both mutant conditions

334 (Figure S3G), suggesting that the regulation of those proteins might be a redundant function of the  
 335 two ubiquitin ligases.

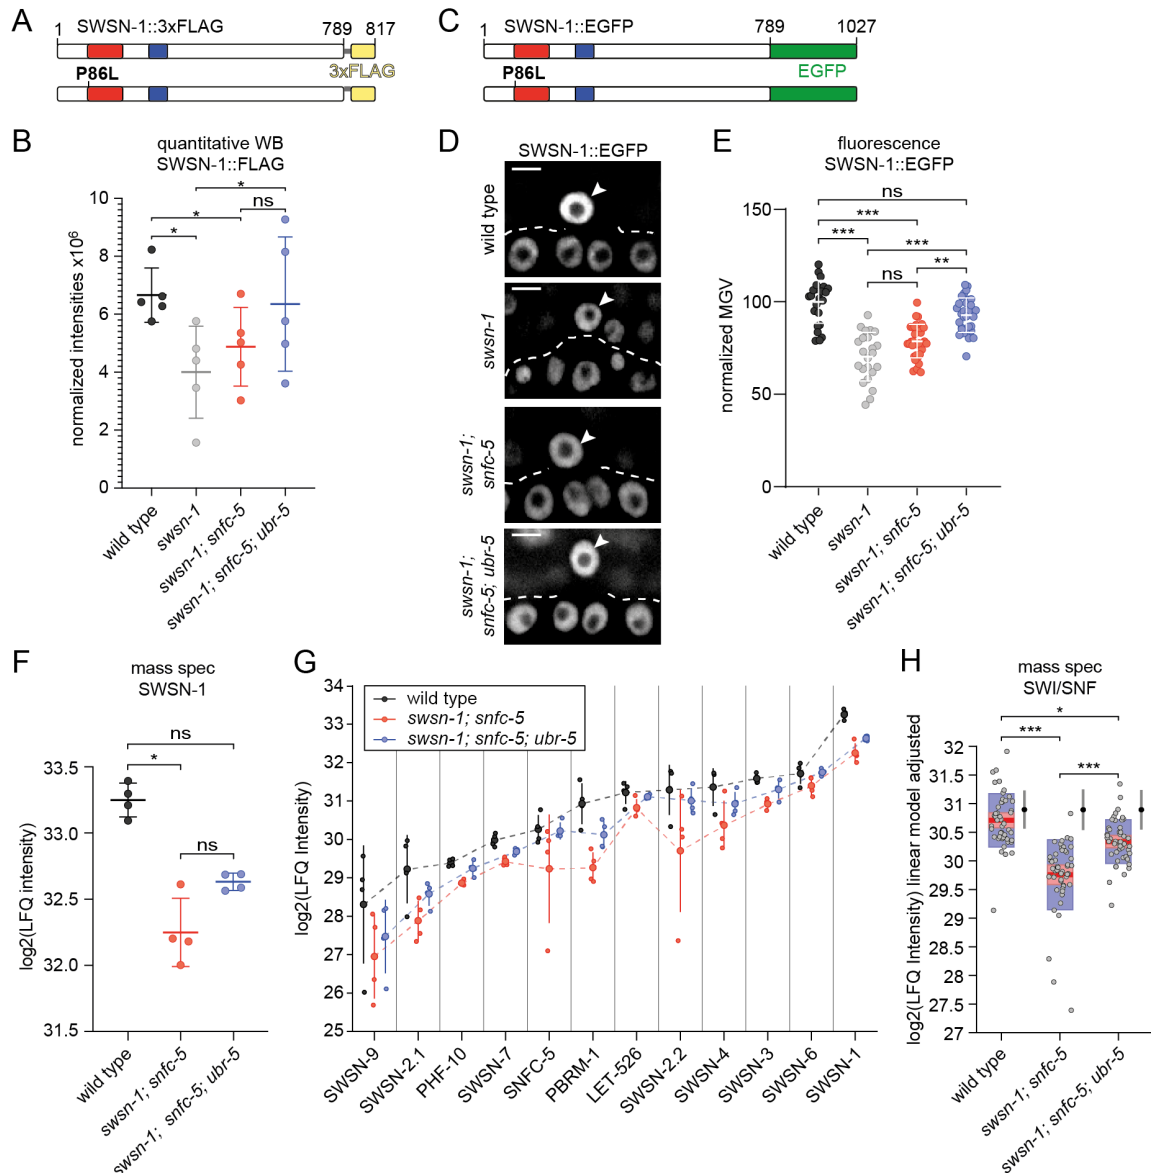

336  
 337 **Figure 3: UBR-5 regulates SWI/SNF protein levels.** **A)** In scale schematic representation of the wild-type and  
 338 P86L SWSN-1::FLAG proteins. The SWIRM protein domain is shown in red, the SANT protein domain in blue, the  
 339 glycine linker in grey and the 3xFLAG-tag in yellow. **B)** Western blot quantification of SWSN-1::FLAG protein levels  
 340 in synchronized L1-staged wild-type (*swsn-1::3xflag*), *swsn-1* single mutant (*swsn-1<sup>ts</sup>::FLAG*), *swsn-1; snfc-5*  
 341 double mutant (*swsn-1<sup>ts</sup>::3xflag; snfc-5*) and *swsn-1; snfc-5; ubr-5* triple mutant (*swsn-1<sup>ts</sup>::3xflag; snfc-5; ubr-5*)  
 342 animals (n=5). The y-axis represents raw integrated densities of SWSN-1::FLAG signals  $\times 10^6$  normalized to total  
 343 protein signal. RM one-way ANOVA, \* = Tukey's multiple comparisons test adjusted p-value < 0.05, ns = not  
 344 significant. **C)** In scale schematic representation of the wild-type and P86L SWSN-1::EGFP proteins. The SWIRM  
 345 protein domain is shown in red, the SANT protein domain in blue and the EGFP-tag in green. **D-E)** Quantification  
 346 of SWSN-1::EGFP intensities in the AC of P6.p 4-cell-staged wild-type (*swsn-1::egfp*), *swsn-1* single mutant  
 347 (*swsn-1<sup>ts</sup>::egfp*), *swsn-1; snfc-5* double mutant (*swsn-1<sup>ts</sup>::egfp; snfc-5*) and *swsn-1; snfc-5; ubr-5* triple mutant  
 348 (*swsn-1<sup>ts</sup>::egfp; snfc-5; ubr-5*) animals (D) Representative images of quantified animals, ACs are indicated by white  
 349 arrowheads, scale bar = 5  $\mu$ m. (The corresponding DIC images can be found in Figure S3A.) (E) SWSN-1::EGFP  
 350 mean grey values (MGV) of ACs of individually quantified animals, Kruskal-Wallis test ( $H_3 = 60.09$ ,  $p < 0.0001$ ),  
 351 Dunn's multiple comparison test adjusted p-value \*\* = < 0.001, \*\*\* = < 0.0001, ns = not significant. **F)** SWSN-1  
 352 protein levels in L1-staged wild-type, *swsn-1; snfc-5* double mutant and *swsn-1; snfc-5; ubr-5* triple mutant animals  
 353 determined by label-free proteomics mass spec quantification (n=4). The y-axis represents log<sub>2</sub> label-free

354 quantification (LFQ) intensities. Kruskal-Wallis test ( $H_2 = 8.769$ ,  $p < 0.0012$ ), Dunn's multiple comparison test  
355 adjusted p-value \* =  $< 0.01$ , ns = not significant. **G**) Protein levels of SWI/SNF subunits in synchronized L1-staged  
356 wild-type (grey), *swsn-1*; *snfc-5* double mutant (red) and *swsn-1*; *snfc-5* *ubr-5* triple mutant (blue) animals  
357 determined by mass spec using label-free quantification (n=4). Small dots show protein levels of individual  
358 replicates, large dots indicate the mean protein levels and vertical lines the 95% confidence intervals. The dashed  
359 lines connect the mean protein levels of the different subunits for better visualisation of the overall trend. The y-  
360 axis represents log<sub>2</sub> label-free quantification (LFQ) intensities. **H**) Box plot representation of the SWI/SNF complex  
361 protein levels adjusted for subunit type by multiple linear regression (see Figure S3B-C) data of the twelve SWI/SNF  
362 subunits from G combined. Red horizontal lines represent the median, light red boxes the 95% confidence intervals  
363 of the median and the blue boxes represent the standard deviation. The y-axis represents log<sub>2</sub>(LFQ intensities) of  
364 each genotype adjusted by subunit based on the linear model. F-Test, Bonferroni multiple comparison test adjusted  
365 p-value \*  $< 0.01$ , \*\*\*  $< 0.0001$ . The intervals to the right of the boxplots show the mean (black dots) and standard  
366 deviation (blue lines) of 100 randomly chosen sets of 12 proteins. Alleles used: *swsn-1(ku355)*,  
367 *swsn-1(syb2756[swsn-1::3xflag])*, *swsn-1(mj660; syb2756[swsn-1::3xflag])*, *swsn-1(st12187[swsn-1::egfp])*,  
368 *swsn-1(mj661; st12187[swsn-1::egfp])*, *snfc-5(mj633)*, *ubr-5(mj638)*.

### 369 **Mutations that suppress the embryonic lethality of *swsn-1* mutants restore wild-type** 370 **expression of 335 SWI/SNF regulated genes**

371 As chromatin remodellers, the SWI/SNF complexes are thought to control the expression of  
372 various genes by enabling or preventing DNA access for the transcription machinery. This involves  
373 positioning of nucleosomes to expose promoter and enhancer sequences, thereby enabling the  
374 binding of transcription factors and RNA polymerase II (RNA pol II). Similarly, SWI/SNF complexes  
375 can facilitate the binding of repressors and disable the access to transcription start sites (TSS)  
376 (Saha et al., 2006; Wilson and Roberts, 2011). Previous studies analysing the transcriptomes of  
377 young adult-staged *swsn-1* mutants, reported that between 7.5% (Riedel et al., 2013) and  
378 approximately one third (Mathies et al., 2020) of *C. elegans* genes are regulated by the SWI/SNF  
379 complex. To identify changes in gene expression that might lead to the developmental defects of  
380 *swsn-1* mutants, we conducted three independent RNA-sequencing experiments (sets 1 – 3) using  
381 synchronized L1-staged animals (same conditions as for the quantitative Western blotting and  
382 proteomics experiments). We analyzed gene expression profiles of wild-type animals, *ubr-5*  
383 mutants, *swsn-1* mutants, and various combinations of double and triple mutant animals to  
384 investigate how these different mutations affect SWI/SNF regulated gene expression. We found  
385 that approximately 8% of *C. elegans* protein coding genes (1803) were differentially expressed in  
386 *swsn-1* single mutants compared to wild-type animals (Figure 4A). The expression changes of  
387 most of these genes were restored to wild-type levels in the *swsn-1*; *snfc-5* double, *swsn-1*; *snfc-5*;  
388 *ubr-5* triple and *swsn-1*; *snfc-5*; *hecd-1* triple suppressor mutants but not restored in *swsn-1*;  
389 *ubr-5* double mutants (Figure 4A). The gene expression profiles of *swsn-1*; *ubr-5* double mutants  
390 were similar to those of *swsn-1* single mutants (Figure S4A) which is consistent with our previous  
391 findings that both of these mutant backgrounds exhibit embryonic lethality under the stringent heat-  
392 shock conditions (Figure 1A-B). These data are consistent with our hypothesis that the *snfc-5*  
393 A258V mutation generally suppresses the defects caused by the *swsn-1* mutation and that the *ubr-5*  
394 mutation alone is not sufficient to suppress defects when animals are exposed to the restrictive

395 temperature at early larval stages. *ubr-5* single mutants had only 62 differentially expressed genes  
396 compared to wild-type animals (Figure 4A).

397 We hypothesized that the suppressor mutants we identified restore developmental defects  
398 of *swn-1* mutants by restoring the expression of developmentally critical genes. However,  
399 identifying the precise SWI/SNF regulated genes that promote animal development is complicated  
400 by the asynchronous developmental rate of SWI/SNF mutant animals (see developmental  
401 progression estimation for the sequenced animals using an available RNA-seq time-course data  
402 set in Figure S4B), which can be slower than wild-type animals. To not confound developmentally  
403 important genes with genes that are differentially expressed due to developmental staging  
404 differences, we compared differentially expressed genes between mutant backgrounds that  
405 exhibited early developmental arrest (*swn-1* single mutants and *swn-1; ubr-5* double mutants,  
406 see Figure S1G) and genetic backgrounds that did not exhibit early developmental arrest (wild-  
407 type animals, *swn-1; snfc-5* double mutants, *swn-1; snfc-5; ubr-5* triple mutants, *swn-1; snfc-5;*  
408 *hecd-1* triple mutants, and *ubr-5* single mutants) at the developmentally synchronized L1 larval  
409 stage (i.e. all genetic backgrounds were synchronized as L1 stage animals). Furthermore, we  
410 performed these RNA-seq experiments in multiple different “sets” (each with four or five biological  
411 replicates) and focused only on genes exhibiting consistent expression changes in all experiments.  
412 From this filtered analysis, we identified 335 genes (out of the 1,083 genes differentially expressed  
413 in *swn-1* single mutants when compared to wild-type animals) that were consistently differentially  
414 expressed in the strongly developmentally arrested *swn-1* single and *swn-1; ubr-5* double  
415 mutants (Figures 1A-B and S1D-H) but displayed near wild-type gene expression in all mutant  
416 backgrounds that did not exhibit the early larval arrest (Figure 4B). We conclude that the  
417 dysregulation of this subset of genes is likely at least partially responsible for driving the early  
418 developmental arrest that occurs in *swn-1* single mutants.

419 To evaluate the potentially direct targets of altered SWI/SNF function on nucleosome  
420 positioning at gene promoters, we performed MNase-sequencing of synchronized L1-staged  
421 (same conditions as for RNA-seq) wild-type animals, *swn-1* single, *swn-1; snfc-5* double and  
422 *swn-1; snfc-5; ubr-5* triple mutants to obtain genome-wide nucleosome coverage profiles. MNase  
423 digests in nucleosome-free regions resulting in a higher signal corresponding to regions protected  
424 by nucleosomes, which we refer to as higher nucleosome coverage. This can result from increased  
425 nucleosome density (i.e. increased probability of a nucleosome being present at all) or a more  
426 precisely positioned nucleosome (i.e. the nucleosome is less “fuzzy”) (Cui and Zhao, 2012). Since  
427 only promoters of ubiquitous and germline-specific genes have clear and well-positioned  
428 nucleosomes (Serizay et al., 2020) and we sequenced *C. elegans* L1 larvae that do not have  
429 extensive germline tissue (Sulston and Horvitz, 1977), the MNase-seq analysis was restricted to  
430 ubiquitous genes. The clearest difference we observed between wild-type animals and *swn-1*  
431 single mutants was a strongly reduced +1 nucleosome coverage (the first nucleosome downstream  
432 of the promoter). The +1 nucleosome coverage in both the *swn-1; snfc-5* double and *swn-1;*

433 *snfc-5; ubr-5* triple suppressor mutants was higher than in *swn-1* single mutants (Figure 4C and  
434 S4C). These findings indicate that SWI/SNF regulates the nucleosomes at the +1 position of  
435 ubiquitously expressed genes and that our suppressor mutations can partially restore the defects  
436 observed in *swn-1* single mutants. Notably, the reduction of the +1 nucleosome coverage in  
437 *swn-1* mutants relative to wild-type nucleosome coverage can also be seen comparing across all  
438 ubiquitous promoters separately, indicating a consistent difference that affects most ubiquitous  
439 promoters (Figure 4D and S4D). The reduced coverage could reflect less well-positioned +1  
440 nucleosomes or reduced nucleosome density at the +1 region. These data suggest that mutation  
441 of *swn-1* affects the chromatin remodelling function of the SWI/SNF complex, which might in turn  
442 explain the observed changes in gene expression.

443 We next asked if our set of 335 developmentally regulated SWI/SNF genes (defined in  
444 Figure 4B) has a distinct nucleosome positioning profile. To do so, we first asked whether genes  
445 with altered expression showed larger changes in nucleosome coverage than genes that did not  
446 show changes in expression. We compared the +1 nucleosome coverage of all ubiquitous genes  
447 to ubiquitously up- (green) and downregulated (purple) developmentally regulated SWI/SNF  
448 genes, which are subsets of the 335 genes. This analysis revealed that the promoters of ubiquitous  
449 genes altered in *swn-1* mutants had a similar reduction in +1 nucleosome coverage relative to  
450 wild-type animals (Figure 4E). These results suggest that the coverage of the +1 nucleosome at  
451 gene promoters changes for many genes in *swn-1* single mutants, but this does not always result  
452 in changes in their expression.

453 Interestingly, we found that the subsets of ubiquitously up- (green) and downregulated  
454 (purple) SWI/SNF-dependent genes have a higher nucleosome coverage in wild-type animals  
455 when compared to all ubiquitous genes in wild-type animals (Figure 4F). Figure 4E indicates that  
456 *swn-1* mutants also have a higher nucleosome coverage in this subset of genes. These findings  
457 show that the 335 developmentally important SWI/SNF genes tend to have more well positioned  
458 +1 nucleosomes or a higher nucleosome density than (ubiquitous) genes on average. This could  
459 suggest that developmentally regulated SWI/SNF genes depend on a well-positioned +1  
460 nucleosome or on a high nucleosome density for their regulation, and that other genes might be  
461 more robust to changes in nucleosome coverage.

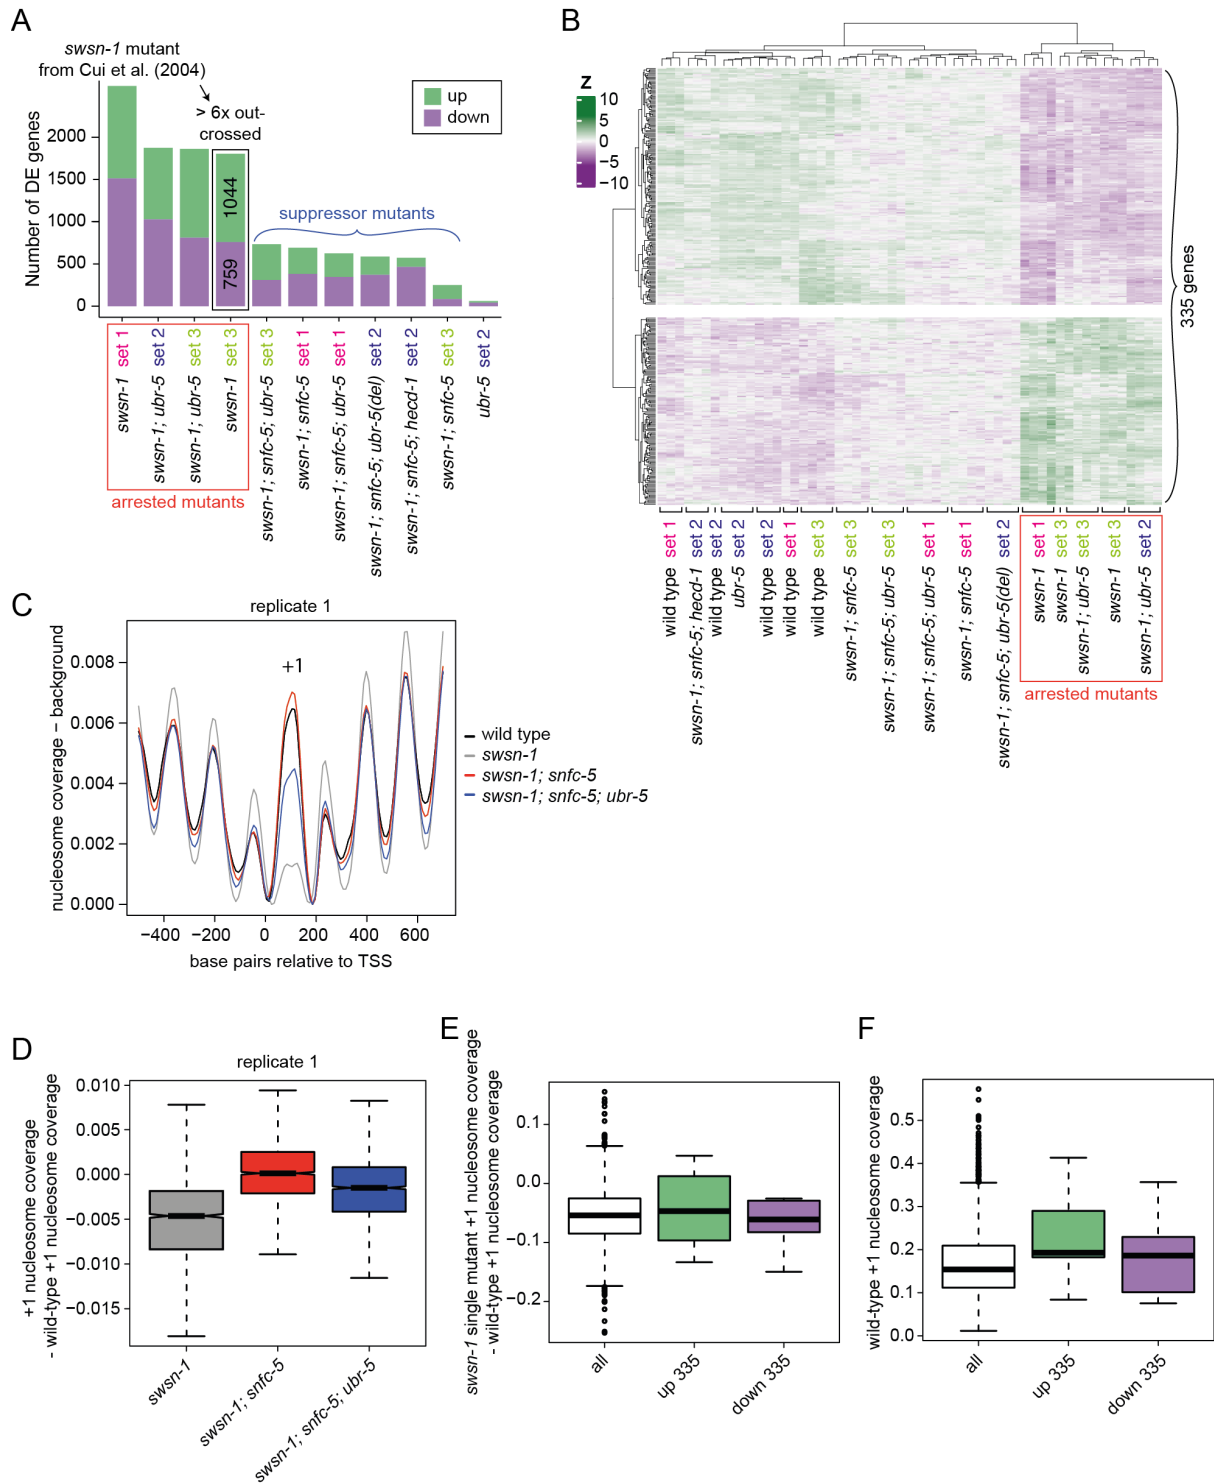

462  
463  
464  
465  
466  
467  
468  
469  
470  
471

**Figure 4: Mutations that suppress the embryonic lethality of *swsn-1* mutants restore wild-type expression of 335 SWI/SNF regulated genes.** **A-B)** Differential gene expression analysis of three independent RNA-sequencing (RNA-seq) experiments (sets 1 - 3) using synchronized L1-staged wild-type animals and *swsn-1* single, *swsn-1; snfc-5* double, *swsn-1; snfc-5; ubr-5* triple (Q150\* and deletion alleles), *swsn-1; snfc-5; hecd-1* triple, *swsn-1; ubr-5* double and *ubr-5* single mutants (n >= 4). (A) Bar graphs of differentially up- (green) or downregulated (purple) genes of the different mutants compared to wild-type animals of their respective RNA-seq set. (B) Z-score heatmap of 335 genes consistently differentially expressed (DE) only in *swsn-1* single and *swsn-1; ubr-5* double mutants. **C-F)** Nucleosome coverage analysis of MNase-sequencing (MNase-seq) data using synchronized L1-staged wild-type animals and *swsn-1* single, *swsn-1; snfc-5* double and *swsn-1; snfc-5; ubr-5*



472 triple mutants. (C) Nucleosome traces around the TSS of ubiquitous genes. (D) Box plots of locus-by-locus +1  
473 nucleosome coverage of ubiquitous genes in the mutants relative to wild-type coverage. Bold horizontal lines  
474 represent the median, boxes represent interquartile range and whiskers extend to the greatest point  $\leq 1.5$  times  
475 the interquartile range. (E) Box plots of *swn-1* single mutant +1 nucleosome coverage minus wild-type +1  
476 nucleosome coverage of all ubiquitous genes (white) and ubiquitous up- (green) and downregulated (purple) genes  
477 from the 335 genes from B. Bold horizontal lines represent the median, boxes represent interquartile range and  
478 whiskers extend to the greatest point  $\leq 1.5$  times the interquartile range. Individual data points represent outliers.  
479 (F) Box plots of the +1 nucleosome coverage in wild-type animals of all ubiquitous genes (white) and ubiquitous  
480 up- (green) and downregulated (purple) genes from the 335 genes from B. Bold horizontal lines represent the  
481 median, boxes represent interquartile range and whiskers extend to the greatest point  $\leq 1.5$  times the interquartile  
482 range. Individual data points represent outliers. Alleles used: *swn-1(ku355)*, *snfc-5(mj633)*, *ubr-5(mj638)*,  
483 *ubr-5(ok1108)* (used in *swn-1*; *snfc-5*; *ubr-5* triple mutant from RNA-seq set 2, indicated by '(del)'),  
484 *hecd-1(ok1437)*.

## 485 Discussion

486 Here we identified that the combination of a specific missense mutation in *snfc-5* and the loss of  
487 either of two E3 ubiquitin ligases (UBR-5 or HECD-1) can suppress some of the developmental  
488 defects caused by a missense mutation in the core SWI/SNF subunit *swn-1*. UBR-5 and HECD-1  
489 are novel genetic interactors of the SWI/SNF complex, and our studies revealed a previously  
490 unknown functional redundancy between these two ubiquitin ligases in regulating animal  
491 development and fertility. In addition, we established that *swn-1*; *snfc-5* double mutants have  
492 reduced SWI/SNF protein levels, and that the loss of UBR-5 can partially restore these levels.  
493 Together, these results are consistent with a model in which UBR-5 and HECD-1 promote the  
494 degradation of the SWI/SNF complex and that the loss of UBR-5 or HECD-1 can prevent  
495 developmental defects from manifesting by increasing SWI/SNF levels (Figure 5). Missense  
496 mutations in SWI/SNF complex subunits cause a multitude of developmental disorders in humans.  
497 Heterozygous mutations identified in developmental disorders are generally dominant, implying  
498 that dosage-sensitive processes underlie the roles of SWI/SNF complexes in development  
499 (Kadoch and Crabtree, 2015). Our findings suggest that the inhibition of UBR5 and HECTD1 could  
500 be a viable therapeutic strategy to treat developmental disorders caused by dosage sensitive  
501 missense mutations in SWI/SNF complex subunits.

### 502 SWI/SNF complex stability

503 The human SMARCC1/2 dimer is important in early SWI/SNF complex assembly where it serves  
504 as a scaffold to which other subunits bind (He et al., 2020; Mashtalir et al., 2018). Studies of  
505 SWI/SNF complex assembly found that loss of SMARCC1/2 in mice leads to the dissociation and  
506 degradation of the entire complex, presumably because unassembled subunits are less stable  
507 (Narayanan et al., 2015). In the SWI/SNF mutant *C. elegans* model we used here, a P86L mutation  
508 in the SWIRM domain of the *SMARCC1/2* homolog *swn-1* resulted in embryonic lethality at 25°C.  
509 We rescued the embryonic lethality by introducing a A258V mutation in the RPT2 domain of *snfc-5*,

510 homolog of *SMARCB1*. The SWIRM domains of human SMARCC1/2 and yeast SWI3 dimers  
511 directly bind the RPT1 and RPT2 domains of SMARCB1 and SNF5 respectively (Han et al., 2020;  
512 He et al., 2020). Based on these data, we propose a model in which the P86L SWSN-1 mutation  
513 results in a structural change which prevents stable binding to SNFC-5 and complex assembly.  
514 This is supported by the fact that the allele is temperature-sensitive, as we expect destabilization  
515 to be exacerbated by increased temperature. The A258V SNFC-5 mutation in turn introduces  
516 another structural change that allows SNFC-5 to bind mutant SWSN-1 more stably (Figure 5). The  
517 resulting *swsn-1; snfc-5* mutant complex is partially stable, but not as stable as the wild-type  
518 assembly, since we find that the levels of all SWI/SNF subunits in *swsn-1; snfc-5* double mutants  
519 are reduced compared to wild-type animals (Figure 3G-H). Consistent with this, it has previously  
520 been proposed that loss of one SWI/SNF subunit could alter the abundance of the other subunits  
521 (Euskirchen et al., 2011).

522 We also showed that the levels of all SWI/SNF subunits are partially restored to wild-type  
523 levels in *swsn-1; snfc-5; ubr-5* triple mutants (Figure 3G-H). Moreover, even though the loss of  
524 either UBR-5 or HECD-1 did not substantially affect SWI/SNF levels in wild-type animals, we found  
525 that some individual SWI/SNF subunits were increased by approximately 10-20% in *ubr-5* and  
526 *hecd-1* single mutants (Tables S1 and S2). This suggests that UBR-5 and HECD-1 can also affect  
527 the steady state levels of wild-type SWI/SNF subunits. Overall, our data are consistent with a model  
528 in which UBR-5 (and presumably also HECD-1) directly ubiquitinates either SWSN-1 or another  
529 subunit of the SWI/SNF complex to regulate SWI/SNF protein levels. Specifically, our data suggest  
530 that *swsn-1* single mutants form an unstable SWI/SNF complex that consequently gets degraded  
531 by the proteasome resulting in very low SWI/SNF protein levels and embryonic lethality. By  
532 contrast, *swsn-1; snfc-5* double mutants form a partially stable complex that is less prone to  
533 degradation resulting in increased SWI/SNF complex abundance, when compared to *swsn-1*  
534 single mutants, and the prevention of embryonic lethality. Lastly, the loss of UBR-5 or HECD-1  
535 further increase SWI/SNF complex abundance in *swsn-1; snfc-5* double mutants by preventing  
536 some of the turnover of the complex by the proteasome. This ultimately promotes SWI/SNF  
537 function and enables *swsn-1; snfc-5; ubr-5* triple mutants to develop to adulthood (Figure 5).

### 538 *Synergistic functions of UBR-5 and HECD-1*

539 We identified two paralogous HECT-type E3 ubiquitin ligases as suppressors of SWI/SNF mutation  
540 in our screen. Despite the finding that the loss of either of the two enzymes alone appears to  
541 promote animal health in *swsn-1; snfc-5* mutants, we found that the combined loss of these two  
542 proteins has deleterious effects on animal health. To our knowledge, this is the first observation of  
543 a synergistic genetic interaction between these two ubiquitin ligases. These findings suggest that  
544 UBR-5 and HECD-1 likely function at least partially redundantly. Our data indicates that the  
545 SWI/SNF complex is one likely such common target of UBR-5 and HECD-1, however our  
546 proteomics profiling of *ubr-5* and *hecd-1* single mutants only observed small increases of different

547 individual SWI/SNF subunits. We suspect that due to the potentially redundant functions of UBR-5  
548 and HECD-1, there would be substantially larger changes in SWI/SNF subunit abundance and  
549 other protein abundances in *ubr-5; hecd-1* double mutants which cannot properly regulate protein  
550 levels via either ubiquitin ligase. These dysregulated protein levels might in turn drive the strong  
551 synthetic phenotypes observed in *ubr-5; hecd-1* double mutants.

#### 552 UBR-5 function at later developmental time points

553 Despite our finding that *swn-1; snfc-5; ubr-5* triple mutants could develop to adulthood, making  
554 them better developmental suppressors than the *swn-1; snfc-5* double mutants, we did not  
555 observe an improved rescue of gene expression or of nucleosome coverage in the triple mutants  
556 when compared to double mutants. We suspect that the loss of UBR-5 on SWI/SNF-dependent  
557 gene expression likely becomes more apparent at later developmental stages. This is supported  
558 by our observations that *ubr-5* alone, in the absence of any *snfc-5* mutation, was capable of  
559 partially suppressing *swn-1* single mutants if they survived to a later (post L1) larval stage (Figure  
560 1D-E and S1K). Future studies looking at different developmental time points might shed light on  
561 how and if UBR-5 affects the gene expression of SWI/SNF target during development.

#### 562 Evolution of SWI/SNF and complex stability

563 Interestingly, many animals including humans, mice, chicken, zebrafish, and fruit flies all already  
564 have a valine at the equivalent position as the A258V substitution in the RPT2 domain of SNFC-5  
565 that we identified as a suppressor in the first mutagenesis screen (Figure S1C). Moreover, one of  
566 the mutants isolated in the second mutagenesis screen carries the additional V129I substitution  
567 mutation in the SWIRM domain of *swn-1* and the human, mouse and fruit fly SWSN-1 homologs  
568 also have an isoleucine at the equivalent position (Figure S1A). These findings suggest the valine  
569 and isoleucine at these specific positions could make the SWI/SNF complex more robust and these  
570 exact substitutions might have played a role in the evolution of SWI/SNF function. For example,  
571 these specific substitutions might help animals better adapt to higher temperatures such as those  
572 found in warm blooded animals or even the poikilotherm model animals zebrafish and fruit flies  
573 which develop at approximately 28°C (Reed and Jennings, 2011) and 25°C (Hamada et al., 2008)  
574 respectively.

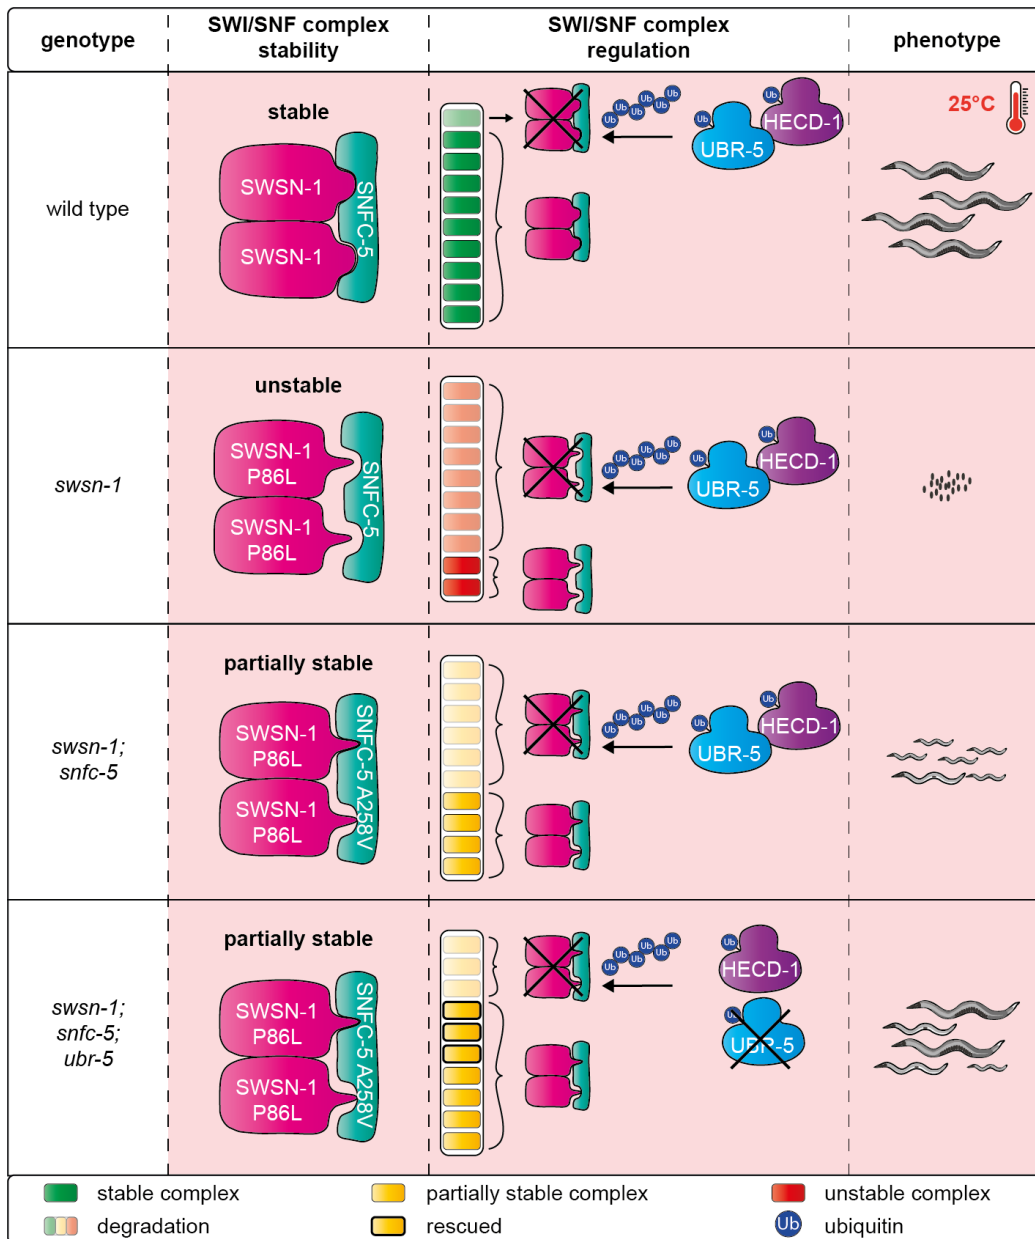

575

576 **Figure 5: Model of *swn-1* mutation suppression by *snfc-5* and *ubr-5* mutation.** In wild-type animals, a stable  
 577 SWI/SNF complex can assemble at 25°C (indicated by a pink box and a thermometer). UBR-5 and HECD-1  
 578 ubiquitinate SWI/SNF complexes for proteasomal degradation to maintain their steady state levels. The *swn-1*  
 579 mutation prevents the assembly of the SWI/SNF complex or leads to the assembly of an unstable complex at 25°C  
 580 due to structural changes that impair the interaction of SWSN-1 and SNFC-5. Mutant SWI/SNF complexes are  
 581 more frequently degraded by the proteasome, which is also mediated by UBR-5 and HECD-1 ubiquitination.  
 582 Additional mutation of *snfc-5* enables the assembly of a partially stable mutant SWI/SNF complex that gets overall  
 583 less frequently degraded by the proteasome. Loss of UBR-5 leads to an increase of SWI/SNF complex protein  
 584 levels in *swn-1*; *snfc-5* mutants by preventing some of the turnover of the complex by the proteasome.

## 585 **EXPERIMENTAL MODEL DETAILS**

### 586 ***C. elegans* strain maintenance**

587 *C. elegans* strains were grown and maintained on nematode growth medium (NGM) agar plates  
588 seeded with HB101 bacteria (Caenorhabditis Genetics Center, University of Minnesota, Twin  
589 Cities, MN, USA) as food source (Brenner, 1974). Strains containing the temperature-sensitive  
590 *swsn-1* mutation were routinely kept at 15°C unless otherwise indicated and other strains were  
591 routinely kept at 20°C or also at 15°C to match growth conditions of temperature-sensitive strains.  
592 The *C. elegans* strains that were used in this study are derived from the Bristol N2 strain  
593 and are listed in the key resource table.

## 594 **METHOD DETAILS**

### 595 **EMS mutagenesis screening**

596 Ethyl methosulfate (EMS) mutagenesis was performed as described previously by Brenner  
597 (Brenner, 1974). Larval 4 (L4)-staged *C. elegans* were washed off plates with M9 buffer, collected  
598 in 15ml falcon tubes and washed three times with M9 buffer. Animals were then incubated with a  
599 final concentration of 0.05M ethyl methosulfate (Sigma Aldrich) in 4ml M9 buffer on a rotating wheel  
600 for four hours at room temperature. After four washes with M9 buffer animals were seeded onto  
601 several agar plates and left to recover at 20°C. Once the F1 offspring of mutagenized animals were  
602 gravid adults, F1 animals were bleached to obtain F2 generation animals. L4 and young adult  
603 staged F2 animals were either maintained at 20°C (first screen) or shifted to 25°C for approximately  
604 16 hours (second screen) and the then gravid adult F2 animals were bleached to obtain F3  
605 generation embryos. The F3 embryos were grown at 25°C for three to five days and screened for  
606 mutants that developed to adulthood. Individually picked F3 mutant animals with the desired  
607 phenotype were recovered at 15°C.

### 608 **Bleaching and synchronisation of *C. elegans***

609 Gravid adult *C. elegans* were washed off NGM plates in M9 buffer (0.6% Na<sub>2</sub>HPO<sub>4</sub>, 0.3% KH<sub>2</sub>PO<sub>4</sub>,  
610 0.5% NaCl and 1mM MgSO<sub>4</sub>) and collected in 15ml falcons or 1.5ml tubes. Animals in 15ml tubes  
611 were pelleted by centrifugation at 2000rpm for 1 minute and M9 buffer was aspirated to leave 2ml,  
612 animals in 1.5ml tubes were pelleted by centrifugation at 3000rpm for 30 seconds and M9 buffer  
613 was aspirated to leave 0.5ml. An equal volume of 2x bleaching solution (1M NaOH and 1.5%  
614 NaClO - free chlorine) was added and animals were vortexed vigorously for 4-6 minutes to destroy  
615 adults and recover embryos. Embryos were washed at least twice in M9 buffer and either directly  
616 seeded onto new NGM plates or left to hatch in 5ml M9 rotating on a wheel at 20°C for 24 hours  
617 to obtain a synchronized population of L1s.

618

## 619 **Collection of synchronized L1-staged *C. elegans***

620 L1s that hatched after bleaching were counted three times in 10 $\mu$ l drops of M9 buffer to estimate  
621 the number of animals present in the 15ml tubes. After 24 hours rotation at 20°C, tubes were spun  
622 down at 4000g for 1 minute, M9 buffer aspirated and a certain number of L1s seeded on 9cm NGM  
623 agar plates, depending on the assay. At least 30,000 L1s per sample were seeded for Western  
624 blotting, 100,000 to 200,000 L1s were seeded for proteomics, 10,000 to 30,000 L1s were seeded  
625 for RNA-sequencing and 55,000 to 60,000 L1s were seeded for MNase-sequencing.  
626 Subsequently, L1s were grown at 25°C for six hours, a period after which the animals are still at  
627 the larval 1 stage of development. L1s were collected into 15ml tubes in M9 buffer with P1000 tips  
628 coated in 0.05% TWEEN-20 (Sigma Aldrich) in M9 buffer. Animals were washed three times in  
629 15ml M9 buffer by pelleting animals with 1-minute centrifugations at 4000g and aspiration of buffer.

630 After the last wash, L1s to be used for Western blotting, proteomics and RNA-sequencing  
631 were transferred into 1.5ml tubes with tips coated in 0.05% TWEEN-20 (Sigma Aldrich) in M9  
632 buffer, spun 1 minute at 8000g and remaining M9 buffer was aspirated carefully to leave little buffer  
633 on the pellets. For protein extractions, 100 $\mu$ l pellets of L1s in M9 were snap frozen with liquid  
634 nitrogen and stored at -70°C. For RNA extractions, 500 $\mu$ l Trizol reagent (Thermo Fisher Scientific)  
635 was added to the pellets and samples stored at -70°C.

636 For MNase-sequencing, small frozen “worm balls” were generated from the L1 pellets  
637 containing little M9 buffer. This was done by dripping small amounts of animal/M9 buffer mix into  
638 a cooled ceramic bowl placed on top of dry ice and filled with liquid nitrogen using a glass Pasteur  
639 pipette. “Worm balls” were carefully collected into 1.5 ml tubes with a cooled metal spoon and  
640 stored at -70°C.

## 641 **CRISPR-Cas9 gene editing**

642 CRISPR-Cas9 gene editing was performed essentially as described previously (Paix et al., 2015).  
643 For the injection mixes 0.5 $\mu$ l KCl (0.5M), 0.74 $\mu$ l Hepes pH 7.5 (100mM), 2.5 $\mu$ l tracrRNA (4  $\mu$ g/ $\mu$ l,  
644 Dharmacon), 0.4 $\mu$ l target gene gRNA (4 $\mu$ g/ $\mu$ l, Dharmacon), 0.4 $\mu$ l homologous recombination  
645 repair template (1  $\mu$ g/ $\mu$ l, IDT) and 50ng Pmyo-3::mCherry::unc-54 co-injection plasmid (pCFJ104)  
646 (Frøkjær-Jensen et al., 2008) were mixed. Then 0.75 $\mu$ l Cas9 (2.5 $\mu$ g/ $\mu$ l, Dharmacon) and DEPC  
647 water up to a volume of 10 $\mu$ l were added, mixed, and incubated at 37°C for 15 min. The mix was  
648 spun down at max. speed in a tabletop centrifuge, 7.5 $\mu$ l of the mix was transferred into a new tube  
649 and micro-injected into the germline young adult staged animals. For the injections, animals were  
650 transferred into a drop of halocarbon oil 700 (Sigma Aldrich) on a cover slip with a 2% agarose  
651 pad. The animals were straightened in the oil drop using an eyelash pick and positioned so gonad  
652 arms could be injected with Femtotip injection capillaries (Eppendorf). An Olympus IX71  
653 microscope equipped with a micromanipulator, FemtoJet injection rig and InjectMan joystick  
654 (Eppendorf) was used for the injections. After the injection, M9 buffer was added to the animals to

655 remove the oil and the animals were transferred to individual plates and recovered at 20°C  
656 overnight. The offspring of injected animals was then screened for animals expressing the red co-  
657 injection plasmid in body wall muscles at a fluorescence microscope. From positive plates,  
658 approximately 100 F1 animals were singled onto new plates and genotyped for the introduced  
659 allele after they produced F2 offspring. F2 offspring of F1 animals carrying the heterozygous  
660 desired allele were singled again and genotyped to obtain a homozygous mutant. The gRNAs and  
661 repair templates that were used in this study are listed in the key resource table.

## 662 **Temperature shift assays**

663 To assess temperature-sensitive developmental defects of different *swn-1* mutants and wild-type  
664 animals, animals were synchronized by bleaching as described in section 'Bleaching and  
665 synchronisation of *C. elegans*'. To assess developmental differences between *swn-1* single and  
666 *swn-1; snfc-5* double mutants, recovered embryos were directly seeded onto NGM agar plates  
667 and grown at 25°C for 48 hours (Figure S1D-F). To assess developmental differences between  
668 *swn-1* single and *swn-1; ubr-5* double mutants, recovered embryos were directly seeded onto  
669 NGM agar plates and grown at 22.5°C for 48 hours and 25°C for 24 hours (Figure 1D-E and S1K).  
670 To assess developmental differences between *swn-1; snfc-5* double mutants and *swn-1; snfc-5;*  
671 *ubr-5* triple mutants, more stringent conditions were used. Recovered embryos were directly  
672 seeded onto NGM agar plates, grown at 15°C until the L4 or young adult stage and then shifted to  
673 25°C for 16 hours. Gravid adults were bleached and recovered embryos were seeded onto new  
674 NGM agar plates and grown at 25°C for 72 hours (Figures 1A-B, S1H, 2B-C and S2).

675 Animals were classified in categories (L1 or > L1, < gravid adult or gravid adult and < L4  
676 or L4 +, respectively) and manually counted (3 replicates of at least 100 animals per genotype  
677 were counted). Subsequently, animals were washed off plates, collected in 1.5ml tubes with M9  
678 buffer, washed twice in 1ml M9, pelleted and M9 buffer aspirated. To image animals, 18µl of  
679 animals in M9 were deposited onto a glass slide coated with a 2% agarose pad and paralyzed by  
680 adding 2µl 100mM tetramisole. A coverslip was added and mounted with transparent nail polish.  
681 Representative differential interference contrast (DIC) microscopy images of animals were taken  
682 with a Leica DM6B microscope (upright microscope with LAS X imaging system) at 10x  
683 magnification and 30ms exposure time or 4x magnification and 10ms exposure time.

## 684 **Live offspring counts**

685 Animals were grown at 20°C and twenty L4-staged animals were individualized onto 50mm NGM  
686 agar plates per genotype. On the following day, each egg-laying adult animal was transferred onto  
687 a fresh plate. This was repeated approximately every 24 hours until the production of embryos  
688 ceased. Number of hatched live offspring was counted manually 24-72 hours after removing the  
689 parental adult. Statistical analyses and plotting of data were conducted using GraphPad Prism (v.  
690 9.0.0).

## 691 **Embryonic lethality and larval hatching quantification**

692 Synchronized embryos (see section 'Bleaching and synchronisation of *C. elegans*') were directly  
693 seeded onto NGM agar plates, grown at 15°C until the L4 or young adult stage and then shifted to  
694 25°C for 16 hours. Gravid adults were bleached, recovered embryos were washed 5 times in M9  
695 buffer and counted three times in 10µl drops of M9 buffer to estimate the number of embryos.  
696 Approximately 200 embryos were seeded onto 50mm NGM agar plates, counted manually to  
697 determine the precise number of embryos seeded and grown at 25°C. After 24 hours, hatched  
698 larvae were manually counted to determine the percentage of larval hatching or embryonic  
699 lethality. Five replicates of approximately 200 animals were counted per genotype and numbers  
700 combined for Fisher's exact test p-value calculations. Statistical analyses and plotting of data were  
701 conducted using GraphPad Prism (v. 9.0.0).

## 702 **Anchor cell (AC) assays**

### 703 ***Assessment of AC invasion***

704 Synchronized animals were grown at 15°C until the L2 molt-early L3 stages, and then shifted to  
705 25°C until the P6.p4-cell stage. AC was defined under differential interference contrast (DIC). An  
706 intact barrier under the AC was used to assess invasion. Wild-type invasion was defined as a  
707 breach as wide as the basolateral surface of the AC (Sherwood and Sternberg, 2003). AC invasion  
708 was scored at the P6.p 4-cell stage, when 100% of wild-type animals exhibit a breach in the BM  
709 (Sherwood and Sternberg, 2003).

### 710 ***Live-cell imaging and image quantification***

711 Animals were mounted into a drop of M9 buffer on a 5% Noble agar pad containing approximately  
712 10mM sodium azide anesthetic and topped with a coverslip. Several experiments were scored  
713 using epifluorescence visualized on a Zeiss Axiocam MRM camera, also mounted on an upright  
714 Zeiss AxioImager A2 and a Plan-Apochromat 100×/1.4 (NA) Oil DIC objective. Microscopy images  
715 were obtained on a Hamamatsu Orca EM-CCD camera mounted on an upright Zeiss AxioImager  
716 A2 with a Borealis-modified CSU10 Yokagawa spinning disk scan head (Nobska Imaging) using  
717 488nm Vortran lasers in a VersaLase merge and a Plan-Apochromat 100×/1.4 (NA) Oil DIC  
718 objective. MetaMorph software (Molecular Devices) was used for microscopy automation. Images  
719 were processed using Fiji/ImageJ (v.2.1.0/1.53c) (Schindelin et al., 2012). Expression levels of  
720 SWSN-1::EGFP were measured by quantifying the mean grey value of AC nuclei, defined as the  
721 somatic gonad cell near the primary vulva. Background subtraction was performed by rolling ball  
722 background subtraction (size = 50). Statistical analyses and plotting of data were conducted using  
723 GraphPad Prism (v. 9.0.0). Figure legends specify what statistical test and p-value cut-off was  
724 used to determine statistical significance.

725



## 726 **Preparation of genomic DNA**

727 Starved *C. elegans* were washed of 90mm NGM plates (one plate relatively full of *C. elegans* per  
728 strain) in M9 buffer and collected in 15ml tubes. Animals were washed twice in M9 buffer, samples  
729 transferred into 1.5ml tubes, pelleted, most of the buffer was removed and pellets stored at -80°C.  
730 Animals were lysed with 1ml Cell Lysis Solution (Qiagen) and samples thawed during this process.  
731 Five µl Proteinase K (20mg/ml, Thermo Fisher Scientific) was added and incubated at 55°C for  
732 approximately 3 hours at 600rpm shaking, until only embryos were left. Lysates were cooled to  
733 room temperature and inverted periodically. Then, 5µl RNase A solution (Thermo Fisher Scientific)  
734 was added, samples incubated at 37°C shaking for 1 hour and cooled one ice for 3 minutes.  
735 Subsequently, 333µl Protein Precipitation Solution (Qiagen) was added and samples were  
736 vortexed vigorously for 20 seconds at high speed. Samples were centrifuged for 10 minutes at  
737 2000rcf and 600µl supernatant transferred into new tubes that were prefilled with 500µl isopropanol  
738 and inverted 50 times to mix. After a 2-hour incubation at -20°C, samples were centrifuged at  
739 maximum speed for 5 minutes, the supernatant aspirated carefully, and DNA pellet washed with  
740 750µl 75% ethanol by inverting the tubes several times. Samples were centrifuged again at 2000rcf  
741 for 3 minutes and supernatant carefully removed with aspirator. Pellets were air dried and  
742 resuspended in 35µl water. DNA samples were stored at 4°C.

## 743 **Whole genome sequencing**

### 744 ***Preparation of genomic DNA libraries***

745 Five µl of genomic DNA sample was run on an 1% agarose gel to ensure that DNA fragments were  
746 of approximately 10kb sizes. DNA concentrations and A260/A280 ratios were determined using  
747 a Nanodrop spectrophotometer (Thermo Fisher Scientific) and concentrations were determined  
748 again by Qubit HS dsDNA fluorometric quantification (Thermo Fisher Scientific) according to the  
749 manufacturer's instructions. Thirty µl of 100-500ng DNA per sample were prepared. Multiplexed  
750 DNA libraries were generated using the Nextera DNA Flex library prep kit (catalog number  
751 20018704, Illumina) and Nextera™ DNA CD Indexes (catalog number 20018707, Illumina)  
752 according to the manufacturer's instructions. Libraries were quantified again by Qubit (Thermo  
753 Fisher Scientific) and quality control was performed by TapeStation run using a D1000 ScreenTape  
754 (Agilent). Samples were sequenced on a HiSeq 1500 machine (Illumina) in paired end mode with  
755 50bp read length.

### 756 ***Data processing and analysis***

757 Raw DNA sequencing reads were trimmed for low quality and adapters using Trimmomatic (Bolger  
758 et al., 2014) (Version 0.39, parameters: ILLUMINACLIP: TruSeq3-SE.fa:2:30:10  
759 SLIDINGWINDOW:4:20 MINLEN:20). Clean reads were aligned to the *C. elegans* WBCel235  
760 reference genome using BWA Mem (Li, 2013). PCR duplicated reads were removed using Picard  
761 tools. The Genome Analysis toolkit (GATK) (Poplin et al., 2018) was then used to re-align the

762 reads across variants using RealignerTargetCreator and IndelRealigner. Varscan (Koboldt et al.,  
763 2009) was used to identify differences (SNPs and Indels) between the samples and the reference  
764 genome. Finally, snpEff (Cingolani et al., 2012) was used to annotate the variants.

#### 765 **RNA extraction and RNA-sequencing**

766 Five freeze-thaw cycles were performed with Trizol samples that were stored at -70°C (see section  
767 'Collection of synchronized L1-staged *C. elegans*'), by thawing samples in a warm or hot water  
768 bath and immediately refreezing samples in liquid nitrogen. RNA extraction and transcriptome  
769 sequencing was performed by BGI Tech Solutions (HongKong) Co.Limited. RNA samples were  
770 sequenced using the BGI DNBSEQ Eukaryotic Strand-specific Transcriptome Resequencing  
771 product.

#### 772 **RNA-sequencing analysis**

773 RNA sequencing reads from the three experimental sets and the developmental time-course RNA-  
774 seq data (Meeuse et al., 2020) were treated in the same way. Raw reads were trimmed for  
775 adapters, low quality sequences and short reads with Trimmomatic (Bolger et al., 2014) (Version  
776 0.39, parameters: ILLUMINACLIP: TruSeq3-SE.fa:2:30:10 SLIDINGWINDOW:4:20 MINLEN:20).  
777 Remaining ribosomal RNA was removed with sortmeRNA (Kopylova et al., 2012) (Version 2.1,  
778 default parameters), clean reads were aligned to the *C. elegans* WBCel235 reference genome and  
779 gene counts quantified with salmon (Patro et al., 2017) (Version 1.9.0, parameters: --gcBias, --  
780 sepBias, -l A). Differentially expressed genes were then identified with DESeq2 (FDR < 0.01) (Love  
781 et al., 2014). Enrichment for previously published mutant RNASeqs was performed with worm Exp  
782 1.0 (Yang et al., 2016). All visualisation was produced with the programming language R and the  
783 ggplot2 library.

#### 784 **Developmental progression estimation**

785 Developmental progression was estimated by comparing gene expression data to a gene  
786 expression time-course obtained from Meeuse et al. (Meeuse et al., 2020) where hourly time points  
787 were taken from arrested and synchronized L1 larval animals and sequenced. Our data also came  
788 from arrested synchronized L1 animals that had been recovered for 6 hours. First, both our data  
789 and the Meeuse et al. data were aligned to the same reference to obtain read counts. Then our  
790 gene expression profile was compared to the time course profile by first using PCA to embed the  
791 Meeuse data alone. Using the eigenvectors obtained from this embedding, our data was  
792 embedded into the same space. From this the distance from each point to the piecewise linear  
793 curve determined by the time course data was computed. Finally, the time from the nearest two  
794 time points was interpolated and used as the estimated developmental time of our samples (see  
795 Figure S4B). Data was plotted using a custom function written in MATLAB for plotting raw data  
796 points with random jitter, along with the mean and 95% confidence interval.

## 797 **MNase-sequencing**

### 798 ***In vivo* MNase digestion**

799 *In vivo* MNase digestion was performed on purified nuclei isolated from *C. elegans* (wild type,  
800 *swn-1* single, *swn-1; snfc-5* double and *swn-1; snfc-5; ubr-5* triple mutant) L1 frozen “worm  
801 balls” (see section ‘Collection of synchronized L1-staged *C. elegans*’). Prior to nuclei harvest,  
802 frozen “worm balls” containing 55,000 to 60,000 L1s for each strain were individually homogenized  
803 in a liquid nitrogen cryo cup. Nuclei purification was optimized using a nuclei pure prep nuclei  
804 isolation kit (NUC-201, Sigma Aldrich). Briefly, 400µl of ice-cold Lysis Solution containing DTT and  
805 Triton X-100 was added to each homogenized sample, vortexed and incubated on ice for 5  
806 minutes. Cell lysis and nuclei morphology was determined by microscopic examination to ensure  
807 proper homogenization by taking 2µl sample. Nuclei were purified by centrifugation through 1.8 M  
808 sucrose cushion solution according to the manufacturer’s protocol. Briefly, 900µl of cold 1.8 M  
809 sucrose cushion solution was added to each 500µl lysate sample on ice and gently mixed. For  
810 each sample preparation, 500µl of ice cold 1.8 M sucrose cushion solution was added to the bottom  
811 of a fresh 2ml Eppendorf tube on ice. A total of 1.4ml of lysate solution from the previous step was  
812 then slowly layered on top of the 500µl of sucrose cushion solution and set for bench top  
813 centrifugation for 45 minutes at 13,000 rpm at 4°C. Supernatant (cytoplasm and cell debris) and  
814 the clear sucrose cushion layers were removed without disturbing the pellet of purified nuclei at  
815 the bottom of each tube. Nuclei pellet was vortexed briefly and resuspended with 500µl cold Nuclei  
816 PURE Storage Buffer. Nuclei pellet were collected by centrifugation at 500g for 5 minutes at 4°C,  
817 resuspended again with 50µl cold Nuclei PURE Storage Buffer and vortexed again to completely  
818 suspend the nuclei pellet. Qubit HS dsDNA quantification was performed on the purified nuclei to  
819 estimate the nucleic acid content. Purified Nuclei of 500ng/reaction were digested with MNase  
820 (M0247S, NEB). The concentration of MNase was titrated for each reaction to obtain  
821 mononucleosomes. 250U/ml resulted in mononucleosomes for replicate 1. A concentration of  
822 200U/ml resulted in mononucleosomes for replicate 2. Digestion was for 15 minutes at 37°C.  
823 MNase digestion was terminated by adding stop solution containing 3% SDS, 20mM EDTA (final  
824 concentrations). Mononucleosomes were treated with Proteinase K (Invitrogen) and incubated at  
825 65°C for 1 hour followed by DNA purification using Zymo clean and Concentrator.  
826 Mononucleosome bands were confirmed by D5000 ScreenTape in an Agilent 2200 TapeStation  
827 system.

828 For library preparation, DNA was measured again with Qubit dsDNA HS Assay Kit and  
829 65ng of mononucleosomal purified DNA was used for NEBNext Ultra II DNA Library Prep Kit  
830 (Illumina) with size selection. Nucleosomal DNA libraries were pooled in groups of 8 per lane and  
831 quantified with by TapeStation (Agilent 2200 TapeStation system) run using a D1000 ScreenTape  
832 (Agilent). Libraries were sequenced on an NextSeq 2000 machine (Illumina) in paired end mode  
833 with 60bp read length.

### 834 **MNase-seq data processing and analysis**

835 The sequenced paired-end reads were mapped to the *C. elegans* (ce11) genome using bowtie2  
836 aligner v.2.2.9 (Langmead and Salzberg, 2012) with default parameters. The resulting bam files  
837 were converted to bigwig tracks using deeptools bamCoverage (Ramírez et al., 2016) with  
838 parameters -bs 1 --extendReads 148 --normalizeUsing RPGC --effectiveGenomeSize 98259998.  
839 Additional parameters for bamCoverage was comprised of --MNase --minFragmentLength 100 --  
840 maxFragmentLength 200 --Offset 1 2 and --smoothLength 30. Peak calling was performed with  
841 MACS2 (Zhang et al., 2008) with default parameters and reads were shifted by 75bp to cover the  
842 nucleosome dyad and extended to 150bp. Deeptools computeMatrix reference-point was used to  
843 compute the nucleosome density across a window spanning the TSS (500bp upstream to 700bp  
844 downstream). The TSS positions were extracted from Serizay et al. (Serizay et al., 2020), as the  
845 midpoint of the 300bp regions annotated as "promoter". Assignments of each promoter to  
846 Ubiquitous, Germline or Somatic was taken from these annotations. The resulting files were read  
847 in to R using the read.table function. To produce metagene plots spanning the region surrounding  
848 the TSS, the signal at 10bp intervals across the region was averaged across all promoters within  
849 the categories above. The "background" intensity was defined as the minimum value across each  
850 trace and was subtracted from each position across the window. A clear signal indicating the  
851 expected nucleosome density was only observed for Ubiquitous genes, as expected since somatic  
852 promoters do not show such well-defined nucleosome densities (Serizay et al., 2020) and L1s do  
853 not have extensive germline tissue (Sulston and Horvitz, 1977). To compare the intensity of the +1  
854 nucleosome across all ubiquitous promoters, the signal spanning from the TSS to 180bp  
855 downstream was extracted for each promoter and the signal for wild type subtracted from the  
856 mutant signal. To link changes in gene expression to changes in nucleosome density at promoters,  
857 the coordinates of the genes were extended by 500bp upstream and intersected with the 300bp  
858 promoter regions using bedtools slop and intersect respectively. Nine of the upregulated and 14 of  
859 the downregulated genes overlapped with ubiquitous promoters and the +1 signal was extracted  
860 and compared across strains.

### 861 **Generation of *C. elegans* protein extracts**

862 Frozen L1 *C. elegans*/M9 pellets (see section 'Collection of synchronized L1-staged *C. elegans*')  
863 were thawed on ice, and 25µl DEPC H<sub>2</sub>O and 125µl of 2x protein lysis buffer (50mM Tris (pH 7.5),  
864 300mM NaCl, 3mM MgCl<sub>2</sub>, 2mM dithiothreitol (DTT), 1% Igepal, complete proteinase inhibitor  
865 cocktail (Roche)) were added to the 100µl L1/M9 mix. Samples were transferred into 2ml  
866 Beadbug™ tubes prefilled with 0.5mm zirconium beads (Merck Life Science) L1s were then broken  
867 up to extract proteins using a Beadbug homogenizer (Merck Life Science) at the highest setting  
868 for 90 seconds three times at 4°C. After every homogenisation step with the Beadbug, samples  
869 were centrifuged at maximum speed at 4°C for 2 minutes followed by 30 seconds at room  
870 temperature to remove bubbles and to check the lysis of the animals. Lysates were transferred

871 into 1.5ml protein lobind tubes (Eppendorf), centrifuged at maximum speed for at least 30 minutes  
872 at 4°C and supernatants were transferred into new 1.5ml tubes. Subsequently, protein  
873 concentrations were determined using the Pierce BCA protein assay kit (Thermo Fisher Scientific)  
874 according to the manufacturer's instructions and measuring the absorbance at 562nm with a  
875 spectrophotometer (Microplate Absorbance Reader, Hidex). Relative protein concentrations of  
876 samples were calculated using a bovine serum albumin (BSA) standard curve. Protein extracts  
877 were snap-frozen in liquid nitrogen and stored at stored at -70°C or used directly.

## 878 **SDS-PAGE**

879 For sodium dodecyl sulphate polyacrylamide gel electrophoresis (SDS-PAGE), 25-30µg of *C.*  
880 *elegans* L1 protein extracts were supplemented with 10x NuPAGE Sample Reducing Agent and  
881 4x LDS sample buffer (Thermo Fisher Scientific) to a final 1x concentration and denatured at 95°C  
882 for 5 minutes. Proteins were resolved alongside a protein ladder (PageRuler Plus Pre-stained  
883 Protein Ladder, Thermo Fisher Scientific) on NuPAGE 4-12% BisTris gradient gels using NuPAGE  
884 MOPS SDS running buffer (Thermo Fisher Scientific). Gel electrophoresis was routinely performed  
885 at 150V for approximately 1 hour and 15 minutes in a XCell SureLock electrophoresis system  
886 (Thermo Fisher Scientific) connected to a Bio-Rad PowerPac (Bio-Rad).

## 887 **Western blotting**

888 Separated proteins were wet transferred onto 0.45mm pore-sized PVDF membranes  
889 (Immobilon®-FL PVDF membrane, Millipore) for 2 hours at 250mA and 4°C using cold transfer  
890 buffer (1.5x NuPAGE transfer buffer (Thermo Fisher Scientific), 10% methanol, 250µl 20% SDS/L)  
891 in a Mini Trans-Blot Cell (Bio-Rad). After the transfer, PVDF membranes were washed in water for  
892 5 minutes, followed by a 2-minute shaking wash in methanol and another 5-minute wash in water.  
893 Membranes were air dried, rehydrated in methanol and TBST and incubated with Revert 700 Total  
894 Protein Stain (Licor) according to the manufacturer's instructions. To obtain total protein signals  
895 for protein signal normalisation, membranes were imaged in a Licor Odyssey Imager in the 700nm  
896 channel.

897 Subsequently, membranes were blocked in 5% (w/v) milk in TBS-0.1% Tween 20 (TBST)  
898 for 1 hour at room temperature shaking, followed by an overnight 4°C rotating incubation with the  
899 mouse anti-FLAG M2 primary antibody (Sigma Aldrich) at 1:1000 dilution in 5% milk. After three  
900 5-minute shaking washes in TBST, membranes were incubated with a secondary IRDye 800CW  
901 anti-Mouse antibody (Licor) at 1:10,000 dilution in 5% milk in TBST for one hour at room  
902 temperature. Finally, membranes were washed again three times in TBST for 5 minutes shaking  
903 and imaged in the 800nm channel of the Licor Odyssey Imager to obtain SWSN-1::FLAG signals.

## 904 **Quantification of SWSN-1::FLAG protein levels**

905 To quantify protein levels obtained by Western blotting, detected SWSN-1::FLAG signals were  
906 normalized to total protein signals. For this purpose, we subtracted the background of the 800nm

907 SWSN-1::FLAG images by creating background images using the morphological opening (imopen)  
908 function with a disk shaped structuring element of radius 75 pixels and taking the absolute  
909 difference between the image and this background using MATLAB (v2021a Mathworks, Natick,  
910 MA). In Fiji (version 2.1.0/1.53c) (Schindelin et al., 2012), SWSN-1::FLAG signals of the  
911 background subtracted 800nm images were measured by recording the raw integrated densities  
912 within a rectangle drawn around the detected SWSN-1 band. This rectangle was moved across  
913 the image to record the SWSN-1::FLAG signals of every sample without changing its size.  
914 Furthermore, total protein signals of the 700nm images were recorded in Fiji, to determine the  
915 relative amounts of proteins that were loaded into each lane of the polyacrylamide gel and  
916 transferred onto the PVDF membranes. To do this, the raw total protein stain 700nm images were  
917 rotated to straighten the lanes if necessary. Then, a line with a width of 10 was drawn from top to  
918 bottom through one of the protein lanes covering all proteins. This line was moved across all  
919 sample lanes of the image and the line profile data for every lane was recorded from a central  
920 position of each lane. In excel, the wild-type SWSN-1::FLAG line profile data was plotted against  
921 each *swsn-1* single, *swsn-1; snfc-5* double and *swsn-1; snfc-5 ubr-5* triple mutant SWSN-1::FLAG  
922 line profiles and linear trendlines were added. The line profiles have intensity peaks where the  
923 bands occur in the total protein Western blot. The relative total protein levels were computed by  
924 comparing the intensity of each of these peaks in each of the lanes and determining a multiplicative  
925 factor that relates their relative intensities. To align the peaks to compute this factor, we performed  
926 a lag cross correlation correction to test if the collected line profiles matched well together or if  
927 shifting the individual data points up or down by a certain lag increased the correlation between  
928 the wild-type and mutant line profiles. We performed the lag cross correlation correction using *xcorr*  
929 function in MATLAB. The slope of linear trendlines for the best correlated lag were calculated and  
930 used as dilution factors to normalize the recorded mutant SWSN-1::FLAG signals to; the dilution  
931 factor for wild-type SWSN-1::FLAG is 1. The total protein normalized raw integrated densities of  
932 SWSN-1::FLAG signals of five independent quantitative Western blots were plotted in Prism  
933 (version 9.0.0) and a repeated measurements one-way ANOVA was performed to determine if  
934 samples were from the same distribution. After rejecting the null hypothesis, Tukey's multiple  
935 comparison test was used to compare FLAG signals between all the conditions.

## 936 **Label-free proteomics and mass spec**

### 937 ***Label-free proteomics***

938 For proteome analysis, protein lysates (see section 'Generation of *C. elegans* protein extracts')  
939 were supplemented with LDS Sample Buffer (NuPAGE LDS sample buffer, Thermo Fisher  
940 Scientific) with 1 mM dithiothreitol (DTT). Samples were heated at 70°C for 10 min, alkylated by  
941 addition of 5.5 mM chloroacetamide, and 50 µg were loaded onto 4-12% gradient Bis-Tris gels.  
942 Proteins were separated by SDS-PAGE, stained using the Colloidal Blue Staining Kit (Life

943 Technologies) and in-gel digested using trypsin. Peptides were extracted from gel and desalted on  
944 reversed-phase C18 StageTips (Rappsilber et al., 2007).

#### 945 **Mass spec analysis**

946 Peptides were analyzed on a quadrupole Orbitrap mass spectrometer (Exploris 480, Thermo  
947 Scientific) equipped with a UHPLC system (EASY-nLC 1200, Thermo Scientific) as described  
948 (Bekker-Jensen et al., 2020; Kelstrup et al., 2012). The mass spectrometer was operated in data-  
949 dependent mode, automatically switching between MS and MS2 acquisition. Survey full scan MS  
950 spectra (m/z 300–1,700) were acquired in the Orbitrap. The 15 most intense ions were sequentially  
951 isolated and fragmented by higher energy C-trap dissociation (HCD) (Olsen et al., 2007). An ion  
952 selection threshold of 5,000 was used. Peptides with unassigned charge states, as well as with  
953 charge states < +2, were excluded from fragmentation. Fragment spectra were acquired in the  
954 Orbitrap mass analyzer.

#### 955 **Peptide identification**

956 Raw data files were analyzed using MaxQuant software (development version 1.5.2.8) (Cox and  
957 Mann, 2008). Parent ion and MS2 spectra were searched against a database containing 28420  
958 *C.elegans* protein sequences obtained from WormBase (WS269 release), as well as against 4190  
959 proteins in the Ensembl Bacteria *E. coli* REL606 database using the Andromeda search engine  
960 (Cox et al., 2011). Spectra were searched with a mass tolerance of 6 ppm in MS mode, 20 ppm in  
961 HCD MS2 mode, strict trypsin specificity and allowing up to two miscleavages. Cysteine  
962 carbamidomethylation was set as a fixed modification, whilst N-terminal acetylation and oxidation  
963 were set as variable modifications. The dataset was filtered based on posterior error probability  
964 (PEP) to arrive at a FDR < 1% estimated using a target-decoy approach (Elias and Gygi, 2007).  
965 LFQ quantification was performed in the MaxQuant software using at least two LFQ ratio counts;  
966 the fast LFQ and the match between run options were turned on.

#### 967 **Data processing**

968 Processed data from MaxQuant was analyzed in Perseus (version 1.6.15.0) (Tyanova et al., 2016)  
969 and visualized with RStudio (v. 4.1). Proteins or peptides flagged as “reverse”, “only identified by  
970 site” or “potential contaminant” were excluded from downstream analysis. Only proteins identified  
971 by no less than two peptides and at least one unique peptide were used in downstream analysis.  
972 Proteins mapped to the *E.coli* protein database were discarded. This dataset was further filtered  
973 so that proteins identified in at least two out of four replicates for each condition were kept. Missing  
974 values were imputed using random values from a Gaussian distribution using the default  
975 parameters in Perseus. P-values were calculated with a standard two-sided t-test and Benjamini-  
976 Hochberg correction was used for FDR calculation. Data visualization was performed using in-  
977 house R scripts and with existing libraries (ggplot2-v 3.3.5, ggrepel-v 0.9.1, RColorBrewer-v 1.1.2,

978 VennDiagram-v 1.7.1) (see Figure S3F-G). Statistical analyses and plotting of data for Figure 3F  
979 were conducted using GraphPad Prism (v. 9.0.0).

### 980 ***Linear regression analysis of SWI/SNF protein levels***

981 To determine the effect of the *swsn-1; snfc-5* double and *swsn-1; snfc-5; ubr-5* triple mutants on  
982 the protein levels of the SWI/SNF complex as a whole, a linear regression model was fit using the  
983 fitlm function in MATLAB (v2021a, Natick MA). The model was fit using both the subunit/protein  
984 identity and the genetic background as independent variables. As these are non-numeric variables,  
985 the fitlm procedure assigns an arbitrary value to obtain the best linear fit (see Figure S4B-E). fitlm  
986 uses an ANOVA to return an f-statistic which tests the null hypothesis that the model is not different  
987 from a null model, and also provides a t-statistic for the null hypothesis that each coefficient is  
988 different from 0. This procedure then estimates the best fit coefficient for each subunit (this can be  
989 thought of as the correction factor for the varying subunit expression levels) and regresses this  
990 out, leaving the effect of the genetic background (see Figure 4H). For reference, randomly selected  
991 sets of 12 proteins were analyzed in the same way, first each set was fit with a linear regression  
992 model and then the mean adjusted LFQ intensity was calculated for each of the genetic  
993 backgrounds. 100 such bootstrap samples were generated and their adjusted mean expression  
994 levels are shown as black dots with grey lines indicating the standard deviation in Figure 4H. These  
995 data were plotted using a custom function in MATLAB to plot the adjusted response.

### 996 **QUANTIFICATION AND STATISTICAL ANALYSIS**

997 Statistical analyses are described in the individual methods sections. Furthermore, figure legends  
998 specify what statistical test and p-value cut-off was used to determine statistical significance.

999



## 1000 Acknowledgements

1001 We thank the Gurdon Institute Media Kitchen for their support in providing reagents and media.  
 1002 We thank Kay Harnish for his support in managing the Gurdon Institute Sequencing Facility. We  
 1003 are grateful for the Miska Laboratory members, especially Giulia Furlan and Miguel Almeida, and  
 1004 Yaron Galanty for helpful discussions, and Marc Ridyard for laboratory management and  
 1005 maintenance of our nematode collection. Some *C. elegans* strains were provided by the CGC,  
 1006 which is funded by NIH Office of Research Infrastructure Programs (P40 OD010440). This work  
 1007 was supported by grants to E.A.M. from Cancer Research UK (C13474/A27826) and the Wellcome  
 1008 Trust (219475/Z/19/Z). Work in the Sarkies Laboratory was funded by the Medical Research  
 1009 Council (Epigenetics and Evolution), University of Oxford Department of Biochemistry and Lincoln  
 1010 College Oxford. This work was also supported by research grants to D.Q.M. from the National  
 1011 Institute of General Medical Sciences (NIGMS) [R01GM121597]. Work in the Beli Laboratory was  
 1012 funded by the Deutsche Forschungsgemeinschaft (DFG, German Research Foundation) - Project-  
 1013 ID 259130777 -SFB 1177. L.L. was supported by a Boehringer Ingelheim Fonds PhD fellowship.

## 1014 KEY RESOURCE TABLE 1015

| REAGENT or RESOURCE                                                                                             | SOURCE                         | IDENTIFIER         |
|-----------------------------------------------------------------------------------------------------------------|--------------------------------|--------------------|
| <b>Antibodies</b>                                                                                               |                                |                    |
| Mouse monoclonal anti-FLAG M2                                                                                   | Sigma Aldrich                  | RRID:<br>AB_262044 |
| Donkey polyclonal anti-Mouse, IRDye 800CW                                                                       | Licor                          | RRID:<br>AB_621847 |
| <b>Bacterial and virus strains</b>                                                                              |                                |                    |
| <i>E. coli</i> strain: HB101                                                                                    | Caenorhabditis Genetics Center | HB101              |
| <b>Deposited data</b>                                                                                           |                                |                    |
| In progress                                                                                                     |                                |                    |
|                                                                                                                 |                                |                    |
|                                                                                                                 |                                |                    |
| <b>Experimental models: Organisms/strains</b>                                                                   |                                |                    |
| <i>C. elegans</i> : Strain MH2354: <i>swsn-1(ku355) V</i>                                                       | Cui et al. 2004                | MH2354             |
| <i>C. elegans</i> : Strain RW12187: <i>swsn-1(st12187[swsn-1::egfp]) V</i>                                      | Caenorhabditis Genetics Center | RW12187            |
| <i>C. elegans</i> : Strain SX3598: <i>ubr-5(ok1108) I</i> ; <i>snfc-5(mj633) III</i> ; <i>swsn-1(ku355) V</i>   | This paper                     | SX3598             |
| <i>C. elegans</i> : Strain SX3612: <i>snfc-5(mj633) III</i> ; <i>hecd-1(ok1437) IV</i> ; <i>swsn-1(ku355) V</i> | This paper                     | SX3612             |
| <i>C. elegans</i> : Strain SX3622: <i>snfc-5(mj633) III</i> ; <i>swsn-1(ku355) V</i>                            | This paper                     | SX3622             |
| <i>C. elegans</i> : Strain SX3624: <i>swsn-1(mj660; syb2756[swsn-1::3xflag]) V</i>                              | This paper                     | SX3624             |
| <i>C. elegans</i> : Strain SX3625: <i>ubr-5(mj638) I</i>                                                        | This paper                     | SX3625             |
| <i>C. elegans</i> : Strain SX3627: <i>ubr-5(mj638) I</i> ; <i>snfc-5(mj633) III</i> ; <i>swsn-1(ku355) V</i>    | This paper                     | SX3627             |
| <i>C. elegans</i> : Strain SX3628: <i>ubr-5(mj638) I</i> ; <i>swsn-1(ku355) V</i>                               | This paper                     | SX3628             |

|                                                                                                                                                                                                                                      |            |        |
|--------------------------------------------------------------------------------------------------------------------------------------------------------------------------------------------------------------------------------------|------------|--------|
| <i>C. elegans</i> : Strain SX3635: <i>swn-1(syb2756[swn-1::3xflag]) V</i>                                                                                                                                                            | This paper | SX3635 |
| <i>C. elegans</i> : Strain SX3638: <i>ubr-5(mj638) I; snfc-5(mj633) III; hecd-1(ok1437) IV; swn-1(ku355) V</i>                                                                                                                       | This paper | SX3638 |
| <i>C. elegans</i> : Strain SX3640: <i>ubr-5(mj649) I; snfc-5(mj633) III; swn-1(ku355) V</i>                                                                                                                                          | This paper | SX3640 |
| <i>C. elegans</i> : Strain SX3641: <i>ubr-5(mj650) I; snfc-5(mj633) III; swn-1(ku355) V</i>                                                                                                                                          | This paper | SX3641 |
| <i>C. elegans</i> : Strain SX3644: <i>ubr-5(mj638) I; hecd-1(ok1437) IV</i>                                                                                                                                                          | This paper | SX3644 |
| <i>C. elegans</i> : Strain SX3645: <i>ubr-5(mj638) I; snfc-5(mj633) III; swn-1(mj660; syb2756[swn-1::3xflag]) V</i>                                                                                                                  | This paper | SX3645 |
| <i>C. elegans</i> : Strain SX3653: <i>snfc-5(mj633) III; swn-1(mj661; st12187[swn-1::egfp]) V</i>                                                                                                                                    | This paper | SX3653 |
| <i>C. elegans</i> : Strain SX3655: <i>swn-1(mj661; st12187[swn-1::egfp]) V</i>                                                                                                                                                       | This paper | SX3655 |
| <i>C. elegans</i> : Strain SX3701: <i>ubr-5(mj638) I; snfc-5(mj633) III; swn-1(mj661; st12187[swn-1::egfp]) V</i>                                                                                                                    | This paper | SX3701 |
| <i>C. elegans</i> : Strain SX3714: <i>swn-1(ku355) V</i>                                                                                                                                                                             | This paper | SX3714 |
| <i>C. elegans</i> : Strain SX3715: <i>snfc-5(mj633) III; swn-1(ku355) V</i>                                                                                                                                                          | This paper | SX3715 |
| Oligonucleotides                                                                                                                                                                                                                     |            |        |
| gRNA targeting <i>snfc-5</i> Ala258: ATTAATATTCAACTTGAGAA                                                                                                                                                                            | This paper | N/A    |
| gRNA targeting <i>ubr-5</i> Gln150: TGGTGCTGCTGGAGAAGTAG                                                                                                                                                                             | This paper | N/A    |
| gRNA targeting <i>ubr-5</i> Cys2913: GAGGCGGAAATACACGTGT                                                                                                                                                                             | This paper | N/A    |
| gRNA targeting <i>swn-1</i> Pro86: TCGAACCAGCCGGCGTATGA                                                                                                                                                                              | This paper | N/A    |
| Homologous recombination repair template to generate the Ala258Val substitution:<br>GAAGCGCCACCATTGGATGTGAACATTTGTGATC<br>AGAGAGtCGTTCTtAAGTTaAATATcAATGTTGGAA<br>ACCAGAGTTTGGTTGATCAATTTCGAgatg                                     | This paper | N/A    |
| Homologous recombination repair template to generate the Gln150* nonsynonymous substitution:<br>GTTTATGCTCGAGCTGGTGCTGCTGGAGAAGTAG<br>AaGTCATTCCATTGAGTGGTGGTATGAACACACT<br>GAGAGCAGCAGCcGGAtAAGCCAAATATCGGAGA<br>GTTATGCTTTCAAACAGg | This paper | N/A    |
| Homologous recombination repair template to generate the Cys2913Ala substitution:<br>CTCAGCAAGCGTCATGCTCCGCCCAAGAAGAT<br>GTATTCCTTCCtACAGCtAACACGgcTATTTCCCGC<br>CTCTATGTACCTGTTTACTCGTCAAACGTGTCT                                   | This paper | N/A    |
| Homologous recombination repair template to generate the Cys2913Ser substitution:<br>CTCAGCAAGCGTCATGCTCCGCCCAAGAAGAT<br>GTATTCCTTCCtACAGCtAACACGTcTATTTCCCGC<br>CTCTATGTACCTGTTTACTCGTCAAACGTGTCC                                   | This paper | N/A    |

|                                                                                                                                                                                                   |                                                   |                                                                     |
|---------------------------------------------------------------------------------------------------------------------------------------------------------------------------------------------------|---------------------------------------------------|---------------------------------------------------------------------|
| Homologous recombination repair template to generate the Pro86Leu substitution:<br>ACAACCTCGCCGAAGGAAACGTCATTGAGCAGACC<br>CACTACATTGTAGTCCTCTCATACGCCGGCTGGTT<br>CGACTATAACGCAATTCATCAAATCGAGAAAC | This paper                                        | N/A                                                                 |
| <b>Software and algorithms</b>                                                                                                                                                                    |                                                   |                                                                     |
| Illustrator                                                                                                                                                                                       | Adobe                                             | v. 2021                                                             |
| GraphPad Prism                                                                                                                                                                                    | GraphPad                                          | v. 9.0.0                                                            |
| Fiji                                                                                                                                                                                              | Schindelin et al. 2012                            | <a href="https://fiji.sc/">https://fiji.sc/</a>                     |
| Excel                                                                                                                                                                                             | Microsoft                                         | v.16.63.1                                                           |
| MATLAB                                                                                                                                                                                            | Mathworks                                         | v. 2022a                                                            |
| Maxquant                                                                                                                                                                                          | Max Plank Institute of Biochemistry               | v. 1.5.2.8                                                          |
| Perseus                                                                                                                                                                                           | Max Plank Institute of Biochemistry               | v. 1.6.15.0                                                         |
| RStudio                                                                                                                                                                                           | bcorporation                                      | v. 4.1                                                              |
| Trimmomatic                                                                                                                                                                                       | USADELLAB                                         | v. 0.39                                                             |
| BWA Mem                                                                                                                                                                                           | Heng Li                                           | <a href="https://github.com/lh3/bwa">https://github.com/lh3/bwa</a> |
| Picard tools                                                                                                                                                                                      | Broad Institute                                   | v. 2.27.4                                                           |
| The Genome Analysis toolkit (GATK)                                                                                                                                                                | Broad Institute                                   | v. 4.1.3                                                            |
| Varscan                                                                                                                                                                                           | Daniel C. Koboldt                                 | v. 2.3.8                                                            |
| snpEff                                                                                                                                                                                            | Pablo Cingolani                                   | v. 5.1                                                              |
| bowtie2 aligner                                                                                                                                                                                   | Johns Hopkins University                          | v.2.2.9                                                             |
| deeptools                                                                                                                                                                                         | Max Plank Institute of Immunology and Epigenetics | v. 3.5.1                                                            |
| MACS2                                                                                                                                                                                             | Tao Liu                                           | v. 2.2.7.1                                                          |
| sortmeRNA                                                                                                                                                                                         | Bonsai Bioinformatics                             | v. 2.1                                                              |
| salmon                                                                                                                                                                                            | Rob Patro                                         | v. 1.9.0                                                            |
| DESeq2                                                                                                                                                                                            | Michael Love                                      | v. 1.36.0                                                           |

1016

1017 **References**

- 1018 Akutsu, M., Dikic, I., and Bremm, A. (2016). Ubiquitin chain diversity at a glance. *J. Cell Sci.* 129,  
1019 875–880. <https://doi.org/10.1242/JCS.183954/260238/AM/UBIQUITIN-CHAIN-DIVERSITY-AT-A->  
1020 [GLANCE](#).
- 1021 Bekker-Jensen, D.B., Martínez-Val, A., Steigerwald, S., Rütther, P., Fort, K.L., Arrey, T.N., Harder, A.,  
1022 Makarov, A., and Olsen, J. V. (2020). A compact quadrupole-orbitrap mass spectrometer with FAIMS  
1023 interface improves proteome coverage in short LC gradients. *Mol. Cell. Proteomics* 19, 716–729.  
1024 <https://doi.org/10.1074/mcp.TIR119.001906>.
- 1025 Bolger, A.M., Lohse, M., and Usadel, B. (2014). Trimmomatic: a flexible trimmer for Illumina sequence  
1026 data. *Bioinformatics* 30, 2114–2120. <https://doi.org/10.1093/BIOINFORMATICS/BTU170>.
- 1027 Brenner, S. (1974). The Genetics of *Caenorhabditis elegans*. *Genetics* 71–94. .
- 1028 Bultman, S., Gebuhr, T., Yee, D., La Mantia, C., Nicholson, J., Gilliam, A., Randazzo, F., Metzger, D.,  
1029 Chambon, P., Crabtree, G., et al. (2000). A Brg1 null mutation in the mouse reveals functional  
1030 differences among mammalian SWI/SNF complexes. *Mol. Cell* 6, 1287–1295.  
1031 [https://doi.org/10.1016/S1097-2765\(00\)00127-1](https://doi.org/10.1016/S1097-2765(00)00127-1).
- 1032 Cingolani, P., Platts, A., Wang, L.L., Coon, M., Nguyen, T., Wang, L., Land, S.J., Lu, X., and Ruden,  
1033 D.M. (2012). A program for annotating and predicting the effects of single nucleotide polymorphisms,  
1034 SnpEff: SNPs in the genome of *Drosophila melanogaster* strain w1118; iso-2; iso-3. *Fly (Austin)*. 6,  
1035 80–92. [https://doi.org/10.4161/FLY.19695/SUPPL\\_FILE/KFLY\\_A\\_10919695\\_SM0001.ZIP](https://doi.org/10.4161/FLY.19695/SUPPL_FILE/KFLY_A_10919695_SM0001.ZIP).
- 1036 Cox, J., and Mann, M. (2008). MaxQuant enables high peptide identification rates, individualized  
1037 p.p.b.-range mass accuracies and proteome-wide protein quantification. *Nat. Biotechnol.* 26, 1367–  
1038 1372. <https://doi.org/10.1038/NBT.1511>.
- 1039 Cox, J., Neuhauser, N., Michalski, A., Scheltema, R.A., Olsen, J. V., and Mann, M. (2011).  
1040 Andromeda: a peptide search engine integrated into the MaxQuant environment. *J. Proteome Res.*  
1041 10, 1794–1805. <https://doi.org/10.1021/PR101065J>.
- 1042 Cui, K., and Zhao, K. (2012). Genome-wide approaches to determining nucleosome occupancy in  
1043 metazoans using MNase-Seq. *Methods Mol. Biol.* 833, 413–419. <https://doi.org/10.1007/978-1-61779->  
1044 [477-3\\_24/COVER](#).
- 1045 Cui, M., Fay, D.S., and Han, M. (2004). lin-35/Rb Cooperates With the SWI/SNF Complex to Control  
1046 *Caenorhabditis elegans* Larval Development. *Genetics* 35, 1177–1185.  
1047 <https://doi.org/10.1534/genetics.103.024554>.
- 1048 Elias, J.E., and Gygi, S.P. (2007). Target-decoy search strategy for increased confidence in large-  
1049 scale protein identifications by mass spectrometry. *Nat. Methods* 2007 43 4, 207–214.  
1050 <https://doi.org/10.1038/nmeth1019>.
- 1051 Euskirchen, G.M., Auerbach, R.K., Davidov, E., Gianoulis, T.A., Zhong, G., Rozowsky, J., Bhardwaj,  
1052 N., Gerstein, M.B., and Snyder, M. (2011). Diverse roles and interactions of the SWI/SNF chromatin

- 1053 remodeling complex revealed using global approaches. *PLoS Genet.* 7.  
1054 <https://doi.org/10.1371/journal.pgen.1002008>.
- 1055 Flaus, A., Martin, D.M.A., Barton, G.J., and Owen-Hughes, T. (2006). Identification of multiple distinct  
1056 Snf2 subfamilies with conserved structural motifs. *Nucleic Acids Res.* 34, 2887–2905.  
1057 <https://doi.org/10.1093/NAR/GKL295>.
- 1058 Frøkjær-Jensen, C., Wayne Davis, M., Hopkins, C.E., Newman, B.J., Thummel, J.M., Olesen, S.P.,  
1059 Grunnet, M., and Jorgensen, E.M. (2008). Single-copy insertion of transgenes in *Caenorhabditis*  
1060 *elegans*. *Nat. Genet.* 40, 1375–1383. <https://doi.org/10.1038/ng.248>.
- 1061 Garcia-Barcena, C., Osinalde, N., Ramirez, J., and Mayor, U. (2020). How to Inactivate Human  
1062 Ubiquitin E3 Ligases by Mutation. *Front. Cell Dev. Biol.* 8, 39.  
1063 <https://doi.org/10.3389/fcell.2020.00039>.
- 1064 Hamada, F.N., Rosenzweig, M., Kang, K., Pulver, S.R., Ghezzi, A., Jegla, T.J., and Garrity, P.A.  
1065 (2008). An internal thermal sensor controlling temperature preference in *Drosophila*. *Nature* 454, 217–  
1066 220. <https://doi.org/10.1038/nature07001>.
- 1067 Han, Y., Reyes, A.A., Malik, S., and He, Y. (2020). Cryo-EM structure of SWI/SNF complex bound to  
1068 a nucleosome. *Nature* 579, 452–455. <https://doi.org/10.1038/s41586-020-2087-1>.
- 1069 He, S., Wu, Z., Tian, Y., Yu, Z., Yu, J., Wang, X., Li, J., Liu, B., and Xu, Y. (2020). Structure of  
1070 nucleosome-bound human BAF complex. *Science* (80-. ). eaaz9761.  
1071 <https://doi.org/10.1126/science.aaz9761>.
- 1072 Kadoch, C., and Crabtree, G.R. (2015). Mammalian SWI/SNF chromatin remodeling complexes and  
1073 cancer: Mechanistic insights gained from human genomics. *Sci. Adv.* 1.  
1074 [https://doi.org/10.1126/SCIADV.1500447/ASSET/4396DAC5-0BA9-49F8-8DA2-](https://doi.org/10.1126/SCIADV.1500447/ASSET/4396DAC5-0BA9-49F8-8DA2-96264B0FC7DE/ASSETS/GRAPHIC/1500447-F6.JPEG)  
1075 [96264B0FC7DE/ASSETS/GRAPHIC/1500447-F6.JPEG](https://doi.org/10.1126/SCIADV.1500447/ASSETS/GRAPHIC/1500447-F6.JPEG).
- 1076 Kelstrup, C.D., Young, C., Lavalley, R., Nielsen, M.L., and Olsen, J. V. (2012). Optimized fast and  
1077 sensitive acquisition methods for shotgun proteomics on a quadrupole orbitrap mass spectrometer. *J.*  
1078 *Proteome Res.* 11, 3487–3497.  
1079 [https://doi.org/10.1021/PR3000249/SUPPL\\_FILE/PR3000249\\_SI\\_001.ZIP](https://doi.org/10.1021/PR3000249/SUPPL_FILE/PR3000249_SI_001.ZIP).
- 1080 Koboldt, D.C., Chen, K., Wylie, T., Larson, D.E., McLellan, M.D., Mardis, E.R., Weinstock, G.M.,  
1081 Wilson, R.K., and Ding, L. (2009). VarScan: variant detection in massively parallel sequencing of  
1082 individual and pooled samples. *Bioinformatics* 25, 2283–2285.  
1083 <https://doi.org/10.1093/BIOINFORMATICS/BTP373>.
- 1084 Kopylova, E., Noé, L., and Touzet, H. (2012). SortMeRNA: fast and accurate filtering of ribosomal  
1085 RNAs in metatranscriptomic data. *Bioinformatics* 28, 3211–3217.  
1086 <https://doi.org/10.1093/BIOINFORMATICS/BTS611>.
- 1087 Langmead, B., and Salzberg, S.L. (2012). Fast gapped-read alignment with Bowtie 2. *Nat. Methods*  
1088 2012 9, 357–359. <https://doi.org/10.1038/nmeth.1923>.

- 1089 Large, E.E., and Mathies, L.D. (2014). *Caenorhabditis elegans* SWI/SNF Subunits Control Sequential  
1090 Developmental Stages in the Somatic Gonad. *G3 Genes, Genomes, Genet.* *4*, 471–483.  
1091 <https://doi.org/10.1534/g3.113.009852>.
- 1092 Li, H. (2013). Aligning sequence reads, clone sequences and assembly contigs with BWA-MEM.  
1093 <https://doi.org/10.48550/arxiv.1303.3997>.
- 1094 Love, M.I., Anders, S., and Huber, W. (2014). Differential analysis of count data - the DESeq2  
1095 package. *Genome Biol.* *15*, 550. <https://doi.org/110.1186/s13059-014-0550-8>.
- 1096 Mani, U., S, A.S., Goutham R N, A., and Mohan S, S. (2017). SWI/SNF Infobase—An exclusive  
1097 information portal for SWI/SNF remodeling complex subunits. *PLoS One* *12*.  
1098 <https://doi.org/10.1371/JOURNAL.PONE.0184445>.
- 1099 Mashtalir, N., D'Avino, A.R., Michel, B.C., Luo, J., Pan, J., Otto, J.E., Zullo, H.J., McKenzie, Z.M.,  
1100 Kubiak, R.L., St. Pierre, R., et al. (2018). Modular Organization and Assembly of SWI/SNF Family  
1101 Chromatin Remodeling Complexes. *Cell* *175*, 1272-1288.e20.  
1102 <https://doi.org/10.1016/J.CELL.2018.09.032>.
- 1103 Mathies, L.D., Lindsay, J.H., Handal, A.P., Blackwell, G.M.G., Davies, A.G., and Bettinger, J.C.  
1104 (2020). SWI/SNF complexes act through CBP-1 histone acetyltransferase to regulate acute functional  
1105 tolerance to alcohol. *BMC Genomics* *21*, 1–15. <https://doi.org/10.1186/s12864-020-07059-y>.
- 1106 Meeuse, M.W., Hauser, Y.P., Moya, L.J.M., Hendriks, G.-J., Eglinger, J., Bogaarts, G., Tsiaris, C.,  
1107 and Großhans, H. (2020). Developmental function and state transitions of a gene expression  
1108 oscillator in *Caenorhabditis elegans*. *Mol. Syst. Biol.* *16*, e9498.  
1109 <https://doi.org/10.15252/MSB.20209498>.
- 1110 Narayanan, R., Pirouz, M., Kerimoglu, C., Pham, L., Wagener, R.J., Kiszka, K.A., Rosenbusch, J.,  
1111 Seong, R.H., Kessel, M., Fischer, A., et al. (2015). Loss of BAF (mSWI/SNF) Complexes Causes  
1112 Global Transcriptional and Chromatin State Changes in Forebrain Development. *Cell Rep.* *13*, 1842–  
1113 1854. <https://doi.org/10.1016/J.CELREP.2015.10.046>.
- 1114 Neigeborn, L., and Carlson, M. (1984). Genes Affecting the Regulation of SUC2 Gene Expression by  
1115 Glucose Repression in *Saccharomyces cerevisiae*. *Genetics* *108*, 845.  
1116 <https://doi.org/10.1093/GENETICS/108.4.845>.
- 1117 Olsen, J. V., Macek, B., Lange, O., Makarov, A., Horning, S., and Mann, M. (2007). Higher-energy C-  
1118 trap dissociation for peptide modification analysis. *Nat. Methods* *2007* *4*, 709–712.  
1119 <https://doi.org/10.1038/nmeth1060>.
- 1120 Paix, A., Folkmann, A., Rasoloson, D., and Seydoux, G. (2015). High efficiency, homology-directed  
1121 genome editing in *Caenorhabditis elegans* using CRISPR-Cas9 ribonucleoprotein complexes.  
1122 *Genetics* *201*, 47–54. <https://doi.org/10.1534/genetics.115.179382>.
- 1123 Patro, R., Duggal, G., Love, M.I., Irizarry, R.A., and Kingsford, C. (2017). Salmon provides fast and  
1124 bias-aware quantification of transcript expression. *Nat. Methods* *2017* *14*, 417–419.

- 1125 <https://doi.org/10.1038/nmeth.4197>.
- 1126 Poplin, R., Ruano-Rubio, V., DePristo, M.A., Fennell, T.J., Carneiro, M.O., Auwera, G.A. Van der,  
1127 Kling, D.E., Gauthier, L.D., Levy-Moonshine, A., Roazen, D., et al. (2018). Scaling accurate genetic  
1128 variant discovery to tens of thousands of samples. *BioRxiv* 201178. <https://doi.org/10.1101/201178>.
- 1129 Raab, J.R., Resnick, S., and Magnuson, T. (2015). Genome-Wide Transcriptional Regulation  
1130 Mediated by Biochemically Distinct SWI/SNF Complexes. *PLOS Genet.* *11*, e1005748.  
1131 <https://doi.org/10.1371/JOURNAL.PGEN.1005748>.
- 1132 Ramírez, F., Ryan, D.P., Grüning, B., Bhardwaj, V., Kilpert, F., Richter, A.S., Heyne, S., Dündar, F.,  
1133 and Manke, T. (2016). deepTools2: a next generation web server for deep-sequencing data analysis.  
1134 *Nucleic Acids Res.* *44*, W160–W165. <https://doi.org/10.1093/NAR/GKW257>.
- 1135 Rappsilber, J., Mann, M., and Ishihama, Y. (2007). Protocol for micro-purification, enrichment, pre-  
1136 fractionation and storage of peptides for proteomics using StageTips. *Nat. Protoc.* *2007* *2*, 1896–  
1137 1906. <https://doi.org/10.1038/nprot.2007.261>.
- 1138 Reed, B., and Jennings, M. (2011). Guidance on the housing and care of zebrafish *Danio rerio*.
- 1139 Riedel, C.G., Downen, R.H., Lourenco, G.F., Kirienko, N. V., Heimbucher, T., West, J.A., Bowman,  
1140 S.K., Kingston, R.E., Dillin, A., Asara, J.M., et al. (2013). DAF-16 employs the chromatin remodeller  
1141 SWI/SNF to promote stress resistance and longevity. *Nat. Cell Biol.* *2013* *15*, 491–501.  
1142 <https://doi.org/10.1038/ncb2720>.
- 1143 Ruijtenberg, S., and van den Heuvel, S. (2016). Coordinating cell proliferation and differentiation:  
1144 Antagonism between cell cycle regulators and cell type-specific gene expression. *Cell Cycle* *15*, 196–  
1145 212. <https://doi.org/10.1080/15384101.2015.1120925>.
- 1146 Saha, A., Wittmeyer, J., and Cairns, B.R. (2006). Chromatin remodelling: the industrial revolution of  
1147 DNA around histones. *Nat. Rev.* *7*, 437–447. <https://doi.org/10.1038/nrm1945>.
- 1148 Sawa, H., Kouike, H., and Okano, H. (2000). Components of the SWI/SNF Complex Are Required for  
1149 Asymmetric Cell Division in *C. elegans*. *Mol. Cell* *6*, 617–624. .
- 1150 Schick, S., Rendeiro, A.F., Runggatscher, K., Ringler, A., Boidol, B., Hinkel, M., Májek, P., Vulliard, L.,  
1151 Penz, T., Parapatics, K., et al. (2019). Systematic characterization of BAF mutations provides insights  
1152 into intracomplex synthetic lethality in human cancers. *Nat. Genet.* *51*, 1399–1410.  
1153 <https://doi.org/10.1038/S41588-019-0477-9>.
- 1154 Schindelin, J., Arganda-Carreras, I., Frise, E., Kaynig, V., Longair, M., Pietzsch, T., Preibisch, S.,  
1155 Rueden, C., Saalfeld, S., Schmid, B., et al. (2012). Fiji: an open-source platform for biological-image  
1156 analysis. *Nat. Methods* *9*, 676–682. <https://doi.org/10.1038/NMETH.2019>.
- 1157 Serizay, J., Dong, Y., Jänes, J., Chesney, M., Cerrato, C., and Ahringer, J. (2020). Distinctive  
1158 regulatory architectures of germline-active and somatic genes in *C. elegans*. *Genome Res.* *31*, 1752–  
1159 1765. <https://doi.org/10.1101/GR.265934.120/-/DC1>.
- 1160 Sherwood, D.R., and Sternberg, P.W. (2003). Anchor cell invasion into the vulval epithelium in *C.*

- 1161 *elegans*. *Dev. Cell* 5, 21–31. [https://doi.org/10.1016/S1534-5807\(03\)00168-0](https://doi.org/10.1016/S1534-5807(03)00168-0).
- 1162 Smith, J.J., Xiao, Y., Parsan, N., Medwig-Kinney, T.N., Martinez, M.A.Q., Moore, F.E.Q., Palmisano,  
1163 N.J., Kohrman, A.Q., Reyes, M.C.D., Adikes, R.C., et al. (2022). The SWI/SNF chromatin remodeling  
1164 assemblies BAF and PBAF differentially regulate cell cycle exit and cellular invasion in vivo. *PLoS*  
1165 *Genet.* 18. <https://doi.org/10.1371/JOURNAL.PGEN.1009981>.
- 1166 Sokpor, G., Xie, Y., Rosenbusch, J., and Tuoc, T. (2017). Chromatin remodeling BAF (SWI/SNF)  
1167 complexes in neural development and disorders. *Front. Mol. Neurosci.* 10, 243.  
1168 <https://doi.org/10.3389/FNMOL.2017.00243/BIBTEX>.
- 1169 Stern, M., Jensen, R., and Herskowitz, I. (1984). Five SWI genes are required for expression of the  
1170 HO gene in yeast. *J. Mol. Biol.* 178, 853–868. [https://doi.org/10.1016/0022-2836\(84\)90315-2](https://doi.org/10.1016/0022-2836(84)90315-2).
- 1171 Sulston, J.E., and Horvitz, H.R. (1977). Post-embryonic Cell Lineages of the Nematode,  
1172 *Caenorhabditis elegans*. *Dev. Biol.* 156, 110–156. .
- 1173 Tyanova, S., Temu, T., Sinitcyn, P., Carlson, A., Hein, M.Y., Geiger, T., Mann, M., and Cox, J. (2016).  
1174 The Perseus computational platform for comprehensive analysis of (prote)omics data. *Nat. Methods*  
1175 2016 139 13, 731–740. <https://doi.org/10.1038/nmeth.3901>.
- 1176 Wang, X., Lee, R.S., Alver, B.H., Haswell, J.R., Wang, S., Mieczkowski, J., Drier, Y., Gillespie, S.M.,  
1177 Archer, T.C., Wu, J.N., et al. (2016). SMARCB1-mediated SWI/SNF complex function is essential for  
1178 enhancer regulation. *Nat. Genet.* 2016 492 49, 289–295. <https://doi.org/10.1038/ng.3746>.
- 1179 Wang, Y., Argiles-Castillo, D., Kane, E.I., Zhou, A., and Spratt, D.E. (2020). HECT E3 ubiquitin  
1180 ligases - emerging insights into their biological roles and disease relevance. *J. Cell Sci.* 133.  
1181 <https://doi.org/10.1242/jcs.228072>.
- 1182 Wilson, B.G., and Roberts, C.W.M. (2011). SWI/SNF nucleosome remodellers and cancer. *Nat. Rev.*  
1183 11, 481–492. <https://doi.org/10.1038/nrc3068>.
- 1184 Yang, W., Dierking, K., and Schulenburg, H. (2016). WormExp: a web-based application for a  
1185 *Caenorhabditis elegans*-specific gene expression enrichment analysis. *Bioinformatics* 32, 943–945.  
1186 <https://doi.org/10.1093/BIOINFORMATICS/BTV667>.
- 1187 Zhang, Y., Liu, T., Meyer, C.A., Eeckhoute, J., Johnson, D.S., Bernstein, B.E., Nussbaum, C., Myers,  
1188 R.M., Brown, M., Li, W., et al. (2008). Model-based analysis of ChIP-Seq (MACS). *Genome Biol.* 9, 1–  
1189 9. <https://doi.org/10.1186/GB-2008-9-9-R137/FIGURES/3>.
- 1190 Zheng, N., and Shabek, N. (2017). Ubiquitin Ligases: Structure, Function, and Regulation. *Annu. Rev.*  
1191 *Biochem.* 86, 129–157. <https://doi.org/10.1146/annurev-biochem-060815-014922>.
- 1192





1206 by a red rectangle. **D-F)** Quantification of *C. elegans* developmental stages after exposing embryos to 25°C for 48  
 1207 hours. (D) Representative images of wild-type animals compared to *swsn-1* single and *swsn-1; snfc-5* double  
 1208 mutants, scale bar = 500µm. (E) Percentage of animals older than the larval 1 (L1) stage of >=100 scored animals  
 1209 (n=3). Bar heights represent the mean, error bars represent standard deviation, \*\*\* = Bonferroni corrected Fisher's  
 1210 exact test p-value < 0.0001. (F) Contingency table containing combined developmental stage scorings from  
 1211 triplicates of E. This table was used for Fisher's exact test p-value calculations. **G)** Quantification of larval hatching  
 1212 or embryonic lethality at 25°C 24 hours after collecting 842-1195 embryos from wild-type animals, *swsn-1* single,  
 1213 *swsn-1; snfc-5* double; *swsn-1; snfc-5; ubr-5* triple and *swsn-1; ubr-5* double mutants that were grown at 25°C for  
 1214 16 hours before collecting the embryos. \*\*\* = Fisher's exact test p-value < 0.0001. **H)** Contingency table containing  
 1215 combined developmental stage scorings from triplicates of Figure 1B. This table was used for Fisher's exact test  
 1216 p-value calculations. *swsn-1* single and *swsn-1; ubr-5* double mutants were not scored, because no larvae hatched.  
 1217 **I)** Schematic of the EMS mutagenesis screen with *swsn-1; snfc-5* mutants using more stringent conditions than in  
 1218 B. The restrictive temperature of 25°C is indicated by the red box. **J)** Table of potential causative mutations of  
 1219 mutants recovered in I. **K)** Contingency table containing combined developmental stage scorings from triplicates  
 1220 of Figure 1E. This table was used for Fisher's exact test p-value calculations. **L-M)** Quantification of anchor cell  
 1221 (AC) invasion. (L) Representative images of wild-type animals (normal invasion) compared to *swsn-1* single  
 1222 (defective invasion), *swsn-1; snfc-5* double (normal invasion), *swsn-1; snfc-5; ubr-5* triple (normal invasion) and  
 1223 *swsn-1; ubr-5* double (normal AC invasion, despite defects observed in 23% of animals) mutants, ACs are indicated  
 1224 by white arrowheads, boundaries of breach in the BM are indicated by yellow arrowheads, scale bar = 5µm. (M)  
 1225 Contingency table containing AC invasion scorings of Figure 1G. This table was used for Fisher's exact test p-  
 1226 value calculations. Alleles used: *swsn-1(ku355)*, *snfc-5(mj633)*, *ubr-5(mj638)*, *hecd-1(ok1437)*.

|        | wild type     | <i>swsn-1; snfc-5</i> | <i>swsn-1; snfc-5; ubr-5 Q150*</i> | <i>swsn-1; snfc-5; ubr-5 C2913A</i> | <i>swsn-1; snfc-5; ubr-5 C2913S</i> |
|--------|---------------|-----------------------|------------------------------------|-------------------------------------|-------------------------------------|
| % L4 + | 100 (300/300) | 6.7 (30/417)          | 89.3 (410/459)                     | 76.8 (384/500)                      | 83.3 (418/502)                      |
| % < L4 | 0 (0/300)     | 92.3 (417/447)        | 10.7 (49/459)                      | 23.2 (116/500)                      | 16.7 (84/502)                       |

1227

1228 **Figure S2: Related to Figure 2.** Contingency table containing combined developmental stage scorings from  
 1229 triplicates of Figure 2C. This table was used for Fisher's exact test p-value calculations. Alleles used:  
 1230 *swsn-1(ku355)*, *snfc-5(mj633)*, *ubr-5(mj638)*, *ubr-5(mj650)*, *ubr-5(mj649)*

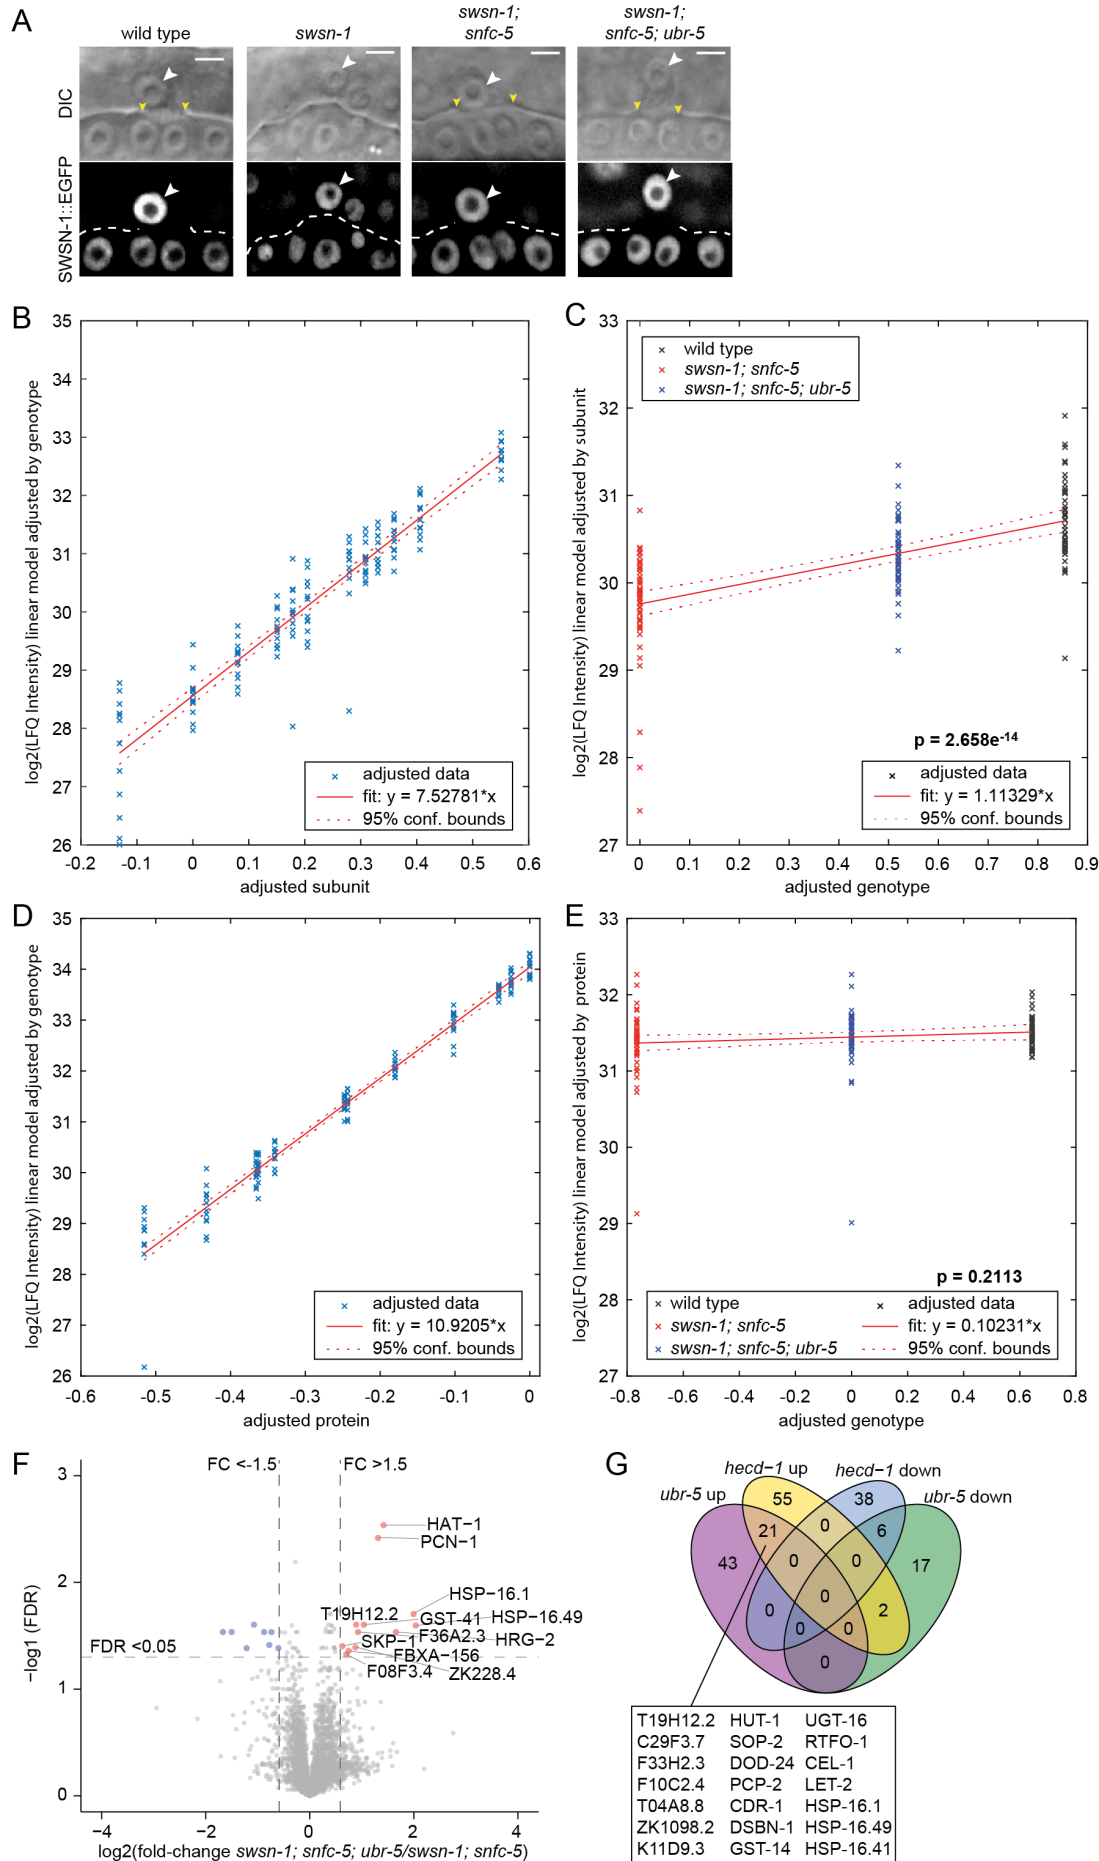

1232 **Figure S3: Related to Figure 3. A)** Quantification of SWSN-1::EGFP intensities in the AC of P6.p 4-cell-staged  
1233 wild-type (*swsn-1::egfp*), *swsn-1* single mutant (*swsn-1<sup>ts</sup>::egfp*), *swsn-1; snfc-5* double mutant (*swsn-1<sup>ts</sup>::egfp*;  
1234 *snfc-5*) and *swsn-1; snfc-5; ubr-5* triple mutant (*swsn-1<sup>ts</sup>::egfp; snfc-5; ubr-5*) animals exposed to 25°C from the  
1235 L2-L3 molt/early L3 stage until the P6.p 4-cell stage. Representative images of quantified animals, ACs are  
1236 indicated by white arrowheads, boundaries of breach in the BM are indicated by yellow arrowheads, scale bar =  
1237 5µm. (The SWSN-1::EGFP images are also displayed in Figure 3D). **B-C)** Linear regression analysis of protein  
1238 levels of the SWI/SNF subunits (B) Added variable plot for protein subunits displaying adjusted protein levels data  
1239 (x) from Figure 3G of the three genotypes combined. The x-axis represents scaled distances of subunits to adapt  
1240 their individual adjusted log<sub>2</sub>(LFQ intensities) to a linear fit (red line). The y-axis represents log<sub>2</sub>(LFQ intensities)  
1241 of the linear model adjusted by genotype. (C) Added variable plot for genotypes displaying adjusted protein levels  
1242 data (x) from Figure 3G of the twelve protein subunits combined. The x-axis represents scaled distances of  
1243 genotypes to adapt their individual adjusted log<sub>2</sub>(LFQ intensities) to a linear fit (red line). The y-axis represents  
1244 log<sub>2</sub>(LFQ intensities) of the linear model adjusted by subunit. ANOVA (p-value = 2.658e<sup>-14</sup>) was used to determine  
1245 that the genotype has an effect on the protein levels of the set of SWI/SNF subunits. **D-E)** Linear regression analysis  
1246 of protein levels of twelve randomly selected proteins (ARX-6, EXOS-1, CYN-1, NBET-1, EMB-4, ZK1236.5, VPS-  
1247 29, TFTC-3, MDT-9, TBA-1, HMT-1 and Y39G8B.1) in synchronized L1-staged wild-type, *swsn-1; snfc-5* double  
1248 mutant and *swsn-1; snfc-5 ubr-5* triple mutant animals determined by label-free proteomics mass spec  
1249 quantification (n=4). (D) Added variable plot for the twelve proteins displaying adjusted protein levels data of the  
1250 three genotypes combined. The x-axis represents scaled distances of the proteins to adapt their individual adjusted  
1251 log<sub>2</sub>(LFQ intensities) to a linear fit (red line). The y-axis represents log<sub>2</sub>(LFQ intensities) of the linear model  
1252 adjusted by genotype. (E) Added variable plot for genotypes displaying adjusted protein levels data of the twelve  
1253 proteins combined. The x-axis represents scaled distances of genotypes to adapt their individual adjusted log<sub>2</sub>(LFQ  
1254 intensities) to a linear fit (red line). The y-axis represents log<sub>2</sub>(LFQ intensities) of the linear model adjusted by  
1255 protein. ANOVA (p-value = 0.02113) was used to determine that the genotype has no effect on the levels of this  
1256 set of twelve randomly selected proteins. **F)** Volcano plot of up- and downregulated proteins in *swsn-1; snfc-5*;  
1257 *ubr-5* triple mutants versus *swsn-1; snfc-5* double mutants determined by mass spec using label-free quantification.  
1258 Fold change < -1.5 or > 1.5, FDR < 0.05. (n=4). **G)** Venn diagram of the overlap between up- and down-regulated  
1259 proteins in *ubr-5* single and *hecd-1* single mutants compared to wild type animals determined by mass spec using  
1260 label-free quantification. Fold change < -1.5 or > 1.5, two-sided t-test p-value < 0.05 (n=4). Alleles used:  
1261 *swsn-1(ku355)*, *swsn-1(syb2756[swsn-1::3xflag])*, *swsn-1(mj660)*; *syb2756[swsn-1::3xflag]*,  
1262 *swsn-1(st12187[swsn-1::egfp])*, *swsn-1(mj661; st12187[swsn-1::egfp])*, *snfc-5(mj633)*, *ubr-5(mj638)*.

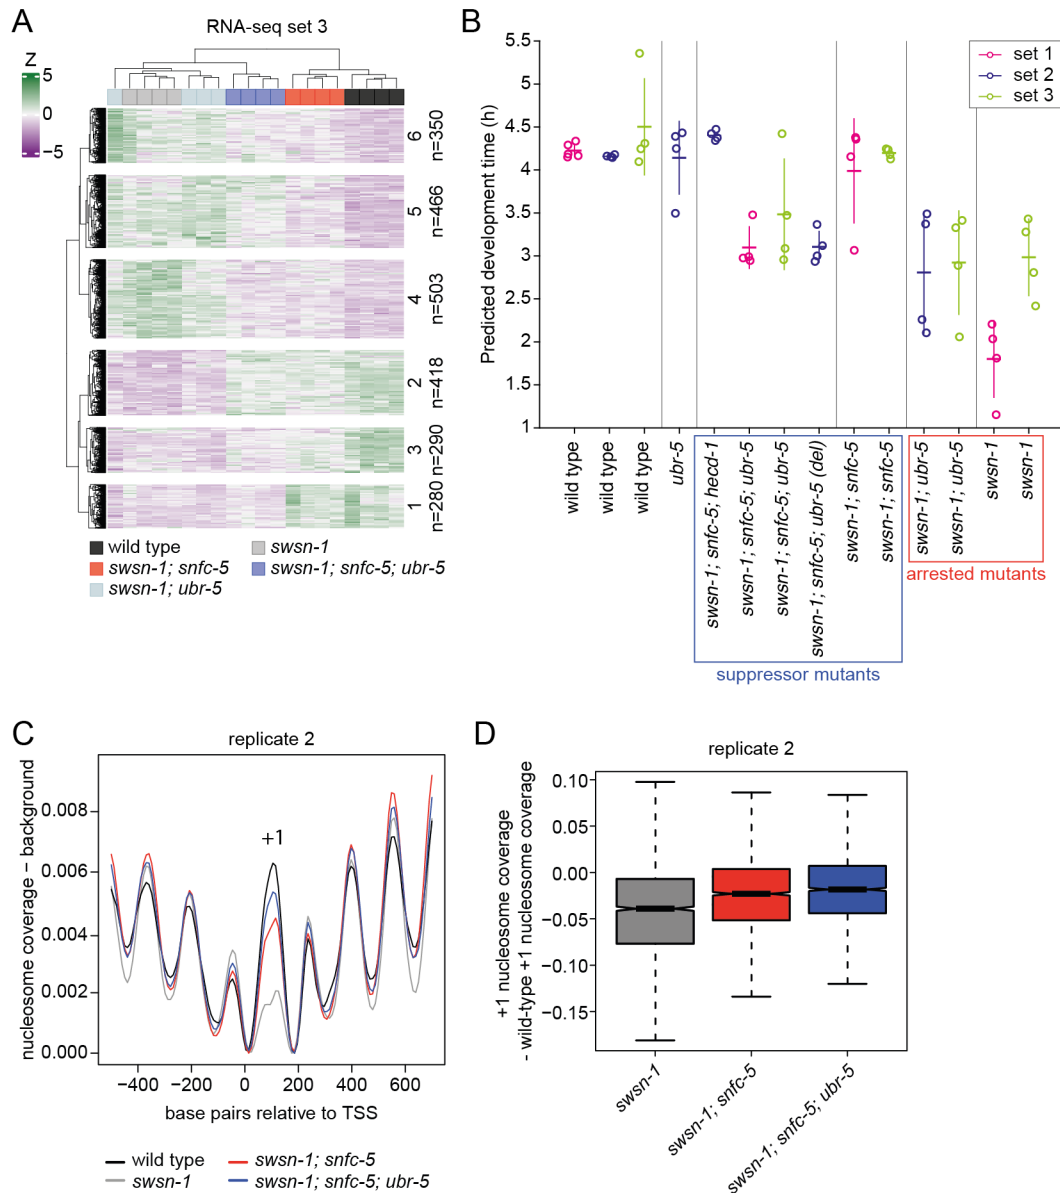

1263

1264

1265

1266

1267

1268

1269

1270

1271

1272

1273

1274

1275

**Figure S4: Related to Figure 4.** **A)** Z-score heatmap of the 2307 DEGs differentially expressed between wild type and at least one mutant from RNA-seq set 3 after K-means clustering. **B)** Predicted developmental progression of the L1-staged mutants and wild-type animals used for RNA-sequencing estimated by comparing their gene expression profiles to a published wild-type *C. elegans* time course (hourly from 1-24 hours of larval development) RNA-seq data set (Meeuse et al., 2020). Vertical lines represent the 95% confidentiality intervals and horizontal lines the mean. **C)** Nucleosome traces around the TSS of ubiquitous genes determined by MNase-seq of synchronized L1-staged wild-type animals and *swn-1* single, *swn-1; snfc-5* double and *swn-1; snfc-5; ubr-5* triple mutants. **D)** Box plots of locus-by-locus +1 nucleosome coverage of ubiquitous genes determined by MNase-seq in *swn-1* single, *swn-1; snfc-5* double and *swn-1; snfc-5; ubr-5* triple mutants relative to wild-type coverage. Bold horizontal lines represent the median, boxes represent interquartile range and whiskers extend to the greatest point  $\leq 1.5$  times the interquartile range. Alleles used: *swn-1(ku355)*, *snfc-5(mj633)*, *ubr-5(mj638)*, *ubr-5(ok1108)* (used in *swn-1; snfc-5; ubr-5* triple mutant from RNA-seq set 2, indicated by '(del)'), *hecd-1(ok1437)*.

1276

| Protein/subunit | FC <i>ubr-5</i> mutant versus wild-type | FDR          |
|-----------------|-----------------------------------------|--------------|
| SWSN-1          | 1.01                                    | 0.853        |
| SWSN-4          | 1.06                                    | 0.257        |
| SNFC-5          | 1.13                                    | 0.157        |
| SWSN-2.1        | 1.15                                    | 0.15         |
| SWSN-2.2        | 1.03                                    | 0.329        |
| SWSN-3          | 1.07                                    | 0.205        |
| SWSN-6          | 0.99                                    | 0.901        |
| PBRM-1          | 1.06                                    | 0.656        |
| <b>SWSN-7</b>   | <b>1.11</b>                             | <b>0.037</b> |
| SWSN-9          | 1.09                                    | 0.49         |
| <b>PHF-10</b>   | <b>1.23</b>                             | <b>0.035</b> |
| LET-526         | 0.94                                    | 0.303        |
| DPFF-1          | 1.0                                     | 0.982        |

1277 **Table S1:** Fold-change of SWI/SNF protein levels in *ubr-5* mutant versus wild-type. FDR = false discovery rate,  
1278 FDR < 0.05 highlighted in bold.

| Protein/subunit | FC <i>hecd-1</i> mutant versus wild-type | FDR          |
|-----------------|------------------------------------------|--------------|
| SWSN-1          | 1.02                                     | 0.829        |
| SWSN-4          | 0.96                                     | 0.833        |
| SNFC-5          | 1.12                                     | 0.291        |
| SWSN-2.1        | 0.99                                     | 0.977        |
| SWSN-2.2        | 1.08                                     | 0.556        |
| <b>SWSN-3</b>   | <b>1.1</b>                               | <b>0.043</b> |
| SWSN-6          | 1.06                                     | 0.459        |
| PBRM-1          | 1.06                                     | 0.707        |
| SWSN-7          | 1.14                                     | 0.189        |
| SWSN-9          | 0.99                                     | 0.956        |
| PHF-10          | 1.18                                     | 0.142        |
| LET-526         | 0.93                                     | 0.518        |
| DPFF-1          | 0.86                                     | 0.349        |

1279 **Table S2:** Fold-change of SWI/SNF protein levels in *hecd-1* mutant versus wild-type. FDR = false discovery rate,  
1280 FDR < 0.05 highlighted in bold.
